# Supplementary material for: RAS pathway mutations as a predictive biomarker for treatment adaptation in pediatric B-cell precursor acute lymphoblastic leukemia
Source: PubMed Central journal article supplement — Leukemia. 2017 Oct 24;32(4):931–40. doi: 10.1038/leu.2017.303 (PMC5886052; doi:10.1038/leu.2017.303), 2017-10-24
Supplement: leu2017303x1.pdf [file leu2017303x1.pdf]

1 Supplemental Data

2 **RAS pathway mutations as predictive biomarker for treatment adaptation in**  
3 **pediatric BCP-ALL**

4 Isabel S. Jerchel<sup>1</sup>, Alex Q. Hoogkamer<sup>1</sup>, Ingrid M. Ariës<sup>1</sup>, Elisabeth M.P. Steeghs<sup>1</sup>, Judith M.  
5 Boer<sup>1</sup>, Nicolle J.M. Besselink<sup>2,3</sup>, Aurélie Boeree<sup>1</sup>, Cesca. van de Ven<sup>1</sup>, Hester A. de Groot-  
6 Kruseman<sup>4</sup>, Valerie de Haas<sup>4,7</sup>, Martin A. Horstmann<sup>5,6</sup>, Gabriele Escherich<sup>5,6</sup>, C. Michel Zwaan<sup>1</sup>,  
7 Edwin Cuppen<sup>2,3</sup>, Marco J. Koudijs<sup>2,3</sup>, R. Pieters<sup>4,7</sup>, and Monique L. den Boer<sup>1,4,\*</sup>

8 <sup>1</sup> Department of Pediatric Oncology, Erasmus Medical Center – Sophia Children’s Hospital,  
9 Rotterdam, the Netherlands

10 <sup>2</sup> Center for Personalized Cancer Treatment, University Medical Center Utrecht, the  
11 Netherlands

12 <sup>3</sup> Center for Molecular Medicine, Cancer Genomics Netherlands, Division Biomedical Genetics,  
13 University Medical Center Utrecht, the Netherlands

14 <sup>4</sup> Dutch Childhood Oncology Group (DCOG), The Hague, the Netherlands

15 <sup>5</sup> Clinic of Pediatric Hematology and Oncology, University Medical Center Hamburg-Eppendorf,  
16 Hamburg, Germany

17 <sup>6</sup> On behalf of the Cooperative Study Group for Childhood Acute Lymphoblastic Leukemia  
18 (COALL)

19 <sup>7</sup> Princess Máxima Center for Pediatric Oncology, Utrecht, the Netherlands

20 \*Corresponding author: Prof. M.L. den Boer, m.l.denboer@erasmusmc.nl

21

## 22 Full online Material and Methods

### 23 Patient material, patient-derived xenografts (PDX), cell lines, and subtype classification

24 This study comprised children with newly diagnosed BCP-ALL enrolled in consecutive Dutch Childhood Oncology  
25 Group trials (DCOG ALL-8, ALL-9 and ALL-10) and German Cooperative ALL trials (COALL 06-97 and 07-03). Written  
26 informed consent was obtained from parents or guardians and institutional review boards approved the use of  
27 excess of diagnostic material for research purposes. These studies were conducted in accordance with the  
28 Declaration of Helsinki. Mononuclear cells were isolated using density gradient centrifugation with Lymphoprep  
29 (Axis Shield, Norway) as described previously<sup>1</sup>. If not indicated otherwise, samples contained at least 90% leukemic  
30 blasts evaluated by morphological examination. In some cases this was achieved by negative selection using  
31 immunomagnetic beads. Animal experiments were approved by the animal ethics committee (EMC 2863 (103-12-  
32 08)). Xenografts of primary patient material were established in three 7-12 week-old female NOD.Cg-  
33 Prkdcscidll2rgtm1Wjl/SzJ (NSG) mice (Charles River, France) per patient, using intra-femoral injection. Animals were  
34 randomly assigned to receive leukemia cell injections. Mice were sacrificed upon signs of overt leukemia or 180 days  
35 after transplantation. Leukemic cells were isolated from bone marrow and spleen, and subsequently used for  
36 sequencing, western blot, and trametinib cytotoxicity assays. Blast percentage was above >90% by morphological  
37 evaluation in all samples, in one case achieved by positive selection using immunomagnetic beads directed to human  
38 CD19 (Miltenyi Biotec, Germany). The leukemic cell line 697 was obtained from the German Collection of  
39 Microorganisms and Cell Cultures, regularly checked for mycoplasma contamination, and its identity verified using  
40 DNA fingerprinting (DSMZ, Germany).

41 Subtypes were determined by karyotype, fluorescence *in-situ* hybridization (FISH) and/or fusion-gene specific PCR,  
42 subdividing patients into *ETV6-RUNX1*-rearranged, *BCR-ABL1*-rearranged, high hyperdiploid karyotype (51-65  
43 chromosomes and/or DNA index  $\geq 1.16$  and  $< 1.5$ ), *MLL*-rearranged (t(4;11)), *TCF3-PBX1*-rearranged, and B-lineage  
44 other (B-other). *BCR-ABL1*-like cases were identified using microarray gene expression profiling by the means of a  
45 110 probeset classifier with proven independent prognostic relevance.<sup>2, 3</sup> In 11 cases all subtypes have been  
46 excluded, except the extremely rare *TCF3-HLF* fusion. As this is extremely rare, we consider it safe to allocate these  
47 cases to the B-other group.

### 48 Cell culture

49 Primary cells were cultured in RPMI-1640 Dutch modified supplemented with 20% FCS, Penicillin, Streptomycin,  
50 Fungizone, gentamicin, insulin, selenite, transferrine, and L-Glutamine (all Life Technologies Europe BV, the  
51 Netherlands). Cell line 697 was cultured in RPMI-1640 +GlutaMAX, supplemented with 10% FCS, Penicillin,  
52 Streptomycin, and Fungizone.

### 53 Ex vivo drug cytotoxicity assays

54 Cell-intrinsic resistance towards common chemotherapeutics was evaluated as previously described.<sup>4</sup> In brief,  
55 freshly isolated primary leukemic cells were incubated with a range of concentrations of prednisolone (0.076 -  
56 250 $\mu$ g/mL), vincristine (0.05 - 50 $\mu$ g/mL), daunorubicin (0.002 - 1.2 $\mu$ g/mL), L-asparaginase (0.003 - 10IU/mL), 6-  
57 mercaptopurine (0.002 - 0.05 $\mu$ g/mL) and 6-thioguanine (0.02 - 0.5 $\mu$ g/mL). After four days, cell viability was  
58 evaluated by adding 3-(4,5-dimethylthiazolyl-2)-2,5-diphenyltetrazolium bromide (MTT) and measuring formazan-  
59 conversion with optical density measurement. LC50-values were calculated (concentration at which 50% conversion  
60 activity was measured relative to untreated control) and compared between groups using a Mann-Whitney U test.  
61 *Ex vivo* sensitivity towards trametinib was measured similarly (range 5 $\mu$ M to 0.6nM and four days incubation). Both  
62 primary material and patient-derived xenograft samples were used to evaluate trametinib sensitivity.

## 63 **Protein isolation and western blot**

64 Leukemic cells were lysed either using radioimmunoprecipitation buffer (Thermo Fisher Scientific) with fresh  
65 phosphatase and protease inhibitors (Sigma Aldrich) or in protein lysis buffer pH 7.4 containing 25mM Tris base,  
66 150mM NaCl, 5mM EDTA pH 8.0, 1% Triton X-100, 10% glycerol, 10mM sodium pyrophosphate, 1mM sodium  
67 orthovanadate, 10mM glycerolphosphate, dithiothreitol, phenylmethylsulfonyl fluoride, Aprotinin, and Sodium-  
68 Fluoride (all Sigma Aldrich). Samples were blotted on nitrocellulose membranes using the BioRad Trans-blot Turbo  
69 system and membranes probed with anti-MEK1/2 (#4694), anti-phospho-MEK1/2 S217/221 (#9154), anti-ERK1/2  
70 (#9107), anti-phospho-ERK1/2 T202/Y204 (#4370), and anti-alpha-tubulin (#2144) according to manufacturer's  
71 instructions (all Cell Signaling Technologies).

## 72 **DNA isolation and sequencing**

73 Genomic DNA and RNA were isolated using Trizol reagent according to manufacturer's protocol (Life Technologies),  
74 or in some cases using the DNeasy blood and tissue kit (Qiagen). Genomic DNA concentration was determined using  
75 the Qubit dsDNA Broad Range Assay Kit (Life Technologies). For TruSeq Custom Amplicon sequencing (Illumina, USA),  
76 100-250ng genomic DNA was used to prepare sequencing libraries according to manufacturer's instructions.  
77 Successful library preparation, correct amplicon length, and concentration was assessed using the Labchip GX  
78 genomic analyzer (Caliper Life Sciences Benelux N.V., the Netherlands) with the HT DNA 12K Reagent Kit, Version 2.  
79 Samples were then pooled equimolarly sequenced on an Illumina MiSeq in paired-end reads of 250bp each. In total,  
80 49 amplicons of mutational hotspot regions in 13 RAS pathway genes were sequenced (Supplemental Table S1).  
81 Detailed information on the design and analysis script will be provided upon request.

82 Sequence reads were exported in fastq format and aligned to the standard 1000 genomes human reference  
83 sequences (version b37, from the GATK resource bundle, the Broad institute, USA) using BWA version 0.7.10<sup>5</sup>. We  
84 applied the GATK indel realigner version 3.3-0 to remove artefacts caused by indels. Reads mapping outside targeted  
85 regions (e.g. due to false priming or poor quality) were excluded. Single nucleotide variants were called with  
86 Freebayes version 0.9.18-24<sup>6</sup>, VarScan version 2.3.7<sup>7</sup>, Bcftools version 1.0<sup>8</sup>, and GATK version 3.3-0<sup>9</sup>. The resulting  
87 variant call format files were annotated using snpEff and snpSift version 4.1a<sup>10</sup> and dbNSFP version 2.7 database<sup>11</sup>.  
88 All variants were combined into a single table and filtered based on several criteria using an in-house developed  
89 pipeline: For each sample, variants were excluded if they were reported by only one caller, had coverage of less than  
90 100 reads, or had less than 20 reads supporting the variant allele. Overall, variants were excluded if they did not  
91 occur at least once with a variant allele frequency (VAF) >2% or were not distributed equally between runs according  
92 to a chi-square test. Furthermore only variants were taken into account that were reported in the COSMIC V73  
93 GRCh37 database (cancer.sanger.ac.uk)<sup>12</sup>, lead to an amino acid change, were unlikely to be a germline variant (see  
94 below), and not a known SNP. A variant was considered to be a SNP if it had a mean population frequency of 5% or  
95 higher across the 1000Gp1 complete human population, 1000Gp1 population of European decent, and the ESP-6500  
96 population of European decent allele frequency database. Variants were labelled as a possible germline variant if  
97 they were found in more than 10 samples with a mean and median VAF of more than 40%.

98 Clonal and subclonal mutations were distinguished based on VAF: assuming heterozygosity, a mutation was  
99 considered to be clonal if VAF exceeded 25% (representing 50% of the cells) and subclonal if VAF was <25%. Since a  
100 minimum number of 20 variant reads was required for variant calling, sufficient coverage was crucial to detect  
101 subclonal mutations. In the 7 most frequently mutated amplicons, coverage allowed detection of clonal mutations  
102 in on average 99% of the samples (Supplemental Tables S1 and S2). Subclonal mutations could be reliably detected  
103 up to 3% VAF in most cases and amplicons (average 87% of cases). Because detection of variants with a frequency  
104 of 1% was limited to a smaller group, the frequency of subclonal mutations is a conservative estimate. However,  
105 based on the observed frequencies we calculated that only a small number of 9 subclonal mutations might be missed

106 in our study (Supplemental Table S2B). In a comparison with 25 samples that were sequenced previously (Ariès et  
107 al.<sup>13</sup>), all variants could be identified by both platforms, indicating a low false-positive rate.

108 Exon 3 of NRAS was sequenced using Sanger sequencing in 253 ALL10 samples, which were part of the clinical  
109 outcome analyses. 248 yielded good quality chromatograms. Samples were analyzed by visual inspection of codons  
110 59 to 63 as well as the R package sangerseqR in combination with the tools above to call and annotate detected  
111 variants. Primer sequences are available upon request.

## 112 **Clinical characteristics and statistics**

113 Clinical characteristics were compared using Fisher's exact test in R (version 3.2.1). We analyzed cases from the  
114 DCOG and COALL diagnosed between 1992 and 2013 with diagnostic data available (n=432). We restricted the RAS  
115 pathway mutated group to those carrying a verified activating mutation in amino acid positions 12, 13, and 146 of  
116 NRAS or KRAS or carrying a variant in FLT3 or PTPN11. Event-free survival (EFS) and cumulative incidence of relapse  
117 and non-response after induction therapy (CIR) were evaluated in 244 eligible cases treated within one protocol  
118 (DCOG ALL10), and analyses were stratified for risk group. Non-eligible were cases who had resided less than 3  
119 months in the Netherlands or who were not treated in a childhood oncology center. Since induction death precludes  
120 risk-group allocation these cases (n=5) were excluded. The COALL97/03 cohort consisted of patients treated in the  
121 consecutive COALL 06-97 and the COALL 07-03 protocols (n=131). For details see Escherich et al.<sup>14</sup> Treatment  
122 intensity in arms LR-R and LR-S was considered comparable to DCOG ALL10 standard risk treatment; LR-I, HR-R, and  
123 HR-S treatment is comparable to the DCOG ALL10 medium risk treatment. In the COALL97/03 study, no high risk  
124 treatment is given that is comparable to the intensity given in the DCOG ALL10 high risk arm. Mean follow-up for  
125 patients at risk was 7.7 years ( $\pm 1.86$  years) in ALL10 and 8.6 years ( $\pm 2.63$  years) for COALL97/03. CIR was estimated  
126 using a competing risks model and compared using Gray's test. EFS probabilities were estimated using the actuarial  
127 Kaplan-Meier method and compared using the log-rank test. Hazard ratios were calculated in SPSS v21 using Cox's  
128 proportional hazard model. All reported tests are two-sided, adjustments for multiple testing were deemed  
129 expendable due to low numbers of comparisons. Outcome analyses were performed in R 3.2.1, using the packages  
130 cmprsk<sup>15</sup> version 2.2-7, mstate version 0.2.7<sup>16</sup>, and survival version 2.38-3<sup>17</sup>.

131

132 **List of supplemental tables and figures**

133 **Tables**

134 Table S1: Median coverage per sample itemized by amplicon.

135 Table S2: Estimate of false negative cases missed due to low coverage in the 8 most frequently mutated regions.

136 Table S3: Frequency and total number of clonal and subclonal RAS pathway mutations per subtype and gene.

137 Table S4: Frequencies of RAS pathway mutations among cytogenetic subtypes of BCP-ALL.

138 Table S5: Frequency of common secondary aberrations in RAS pathway wildtype, clonal and subclonal mutation cases.  
139

140 Table S6: Distribution of clonal and subclonal RAS pathway mutations among the treatment arms of DCOG ALL10

141 Table S7: Clinical characteristics of BCP-ALL patients with subclonal RAS pathway mutations.

142 Table S8: Baseline characteristics of the ALL10 and COALL97/03 cohorts

143 Table S9: Univariate and multivariate analysis of Cox's proportional hazard ratio in Standard-risk treated DCOG  
144 ALL10 cases.

145 Table S10: Median ex vivo LC50-values per RAS pathway mutations.

146

147 **Figures**

148 Figure S1: Diagram with detailed information about the patient cohorts.

149 Figure S2: Amplicon coverage across samples.

150 Figure S3: Relative frequency of *NRAS*, *KRAS*, *PTPN11*, *FLT3* and other RAS pathway mutations.

151 Figure S4: Histogram of observed variant allele-frequencies.

152 Figure S5: Frequency of clonal and subclonal RAS pathway mutations among tyrosine kinase fusion negative and  
153 tyrosine kinase fusion positive BCR-ABL1-like cases.

154 Figure S6: Detailed analysis of mutations affecting the most frequently mutated RAS pathway genes.

155 Figure S7: Event-free survival and cumulative incidence of relapse in the COALL97/03 cohort.

156 Figure S8: Ex vivo sensitivity to prednisolone and vincristine in BCP-ALL cases carrying subclonal or clonal RAS  
157 pathway mutations including *FLT3* and *PTPN11*.

158 Figure S11: Ex vivo chemotherapeutic sensitivity of RAS mutated BCP-ALL cases distinguished by the amino acid  
159 variant in the *NRAS* or *KRAS* gene.

160 Figure S10: RAS pathway mutations and ex vivo cytotoxicity of chemotherapeutic agents.

161 Figure S11: Efficacy of the MEK-inhibitor trametinib in RAS pathway mutant BCP-ALL.

162 **Supplemental Table S1: Median coverage per sample itemized by amplicon.** Amplicons are indicated by  
 163 chromosome and start/end coordinates according to GRCh37. Amplicon ID consists of gene name and a  
 164 consecutive number, + or – indicate targeted strand. ULSO: Upstream Locus-Specific Oligo, DLSO: Downstream  
 165 Locus-Specific Oligo

| Chromo-some | Start     | End       | Amplicon ID | Target exon | Median read depth per sample | ULSO                               | DLSO                               |
|-------------|-----------|-----------|-------------|-------------|------------------------------|------------------------------------|------------------------------------|
| 1           | 115258677 | 115259080 | NRAS_1_+    | 2           | 1912                         | GAGGTAGAATTGCGTAACAGCTCTCT         | AAC TTCGGTCTGGACGCGCAGTGC          |
| 2           | 39249582  | 39249982  | SOS1_1_+    | 11          | 3405                         | GAGTCCTGAGACCAGAAAAGTTACAAGA       | CTTCAATTATATACCCGAAAAGTCTGC        |
| 2           | 39249854  | 39250256  | SOS1_2_+    | 11          | 4303                         | GTCAGCTGAAGAGAAAAACAATTGGATG       | CAACCAAAGACCTCTTTCTTTGACTAA<br>A   |
| 2           | 39250176  | 39250579  | SOS1_3_+    | 11          | 3126                         | CACTAGGCAGCCTCATCTGCTCCTCTTT       | CTTCCATTATAAATTCATTACAACACTG<br>TC |
| 2           | 39278250  | 39278665  | SOS1_4_+    | 7           | 908                          | AACATTAGCACAACTCAGACTGGAAGAA       | CAAATCACAAGTGTGACTTAAACAGG         |
| 3           | 12625886  | 12626290  | RAF1_1_+    | 17          | 3037                         | CTCTAGAGGAAGCAGGAGACAGGG           | CAAACCCACAGCGGTCCCTGGG             |
| 3           | 12626160  | 12626560  | RAF1_2_+    | 16          | 3993                         | GCAATATAAGGTGGGAGTGTTTTGTTT<br>TGT | AGAAGCTGCTGCTAAGGACCTTCTAG         |
| 3           | 12626432  | 12626835  | RAF1_3_+    | 15+16       | 5824                         | AACAAAGCCCAAGAATGCTCTCATTAG        | ACAAGTCTAACCTCTAGTGTCTTA           |
| 3           | 12626708  | 12627112  | RAF1_4_+    | 15          | 8246                         | AAAGGGACAGCCTGGCCCTAGATGTC         | GGATATGCCTCCCCAGATCTTAGTAAG        |
| 3           | 12627036  | 12627437  | RAF1_5_+    | 14          | 5165                         | AAACTGAATGGGTTGTATCCTGCATTC        | GAAATGTACAGAAACGCTTTAAGTTTG<br>C   |
| 3           | 12629037  | 12629445  | RAF1_6_+    | 13          | 628                          | TGAACTGATGGCCAGTGAACATAATG         | GACCCAGGCATCAAATTTGTCCCTAA         |
| 3           | 12632242  | 12632688  | RAF1_7_+    | 12          | 1282                         | CAGAGGGACTGGACCCAGCTTTCTA          | AGGTTAACTGCTATCGCTACAGTTAGG        |
| 3           | 12633174  | 12633623  | RAF1_8_+    | 11          | 54                           | AGAAAAACCTCGTTGGAAATTAGAATA<br>C   | TTGGGGCCCTCCCTTACTAACTGCA          |
| 3           | 12641157  | 12641607  | RAF1_9_+    | 10          | 604                          | CTGCATGATCACAGGCTCTAAACAT          | ATCTAAGAGGCTGCCACATCCCTCAT         |
| 7           | 140453074 | 140453511 | BRAF_1_+    | 16          | 2800                         | GGAGGAAAGAAGAAATTACCAGAGGT<br>C    | CCATTACCATCTTGACCTGGAAGAAG         |
| 11          | 533746    | 534150    | HRAS_1_+    | 3           | 636                          | CAAGAGAATATCTGGGCTACATTGCT         | CAGTTGTCTGGATCCATTTTGTGGATG        |
| 11          | 534080    | 534480    | HRAS_2_+    | 2           | 343                          | AGGATAGGGCTGGCTGCAGCCCTGG          | AGTACAGGTGAACCCCGTAGGCTGG          |
| 11          | 119148789 | 119149238 | CBL_1_+     | 8           | 1529                         | TTCTGAGTGGAATCCCTGCCACAAATCC       | GAGGCACTCCGCTCAATCTTGG             |
| 11          | 119149169 | 119149569 | CBL_2_+     | 9           | 597                          | AGCCCTGACCTTCTGATTCCTGC            | GTTAACAGAAAAGTGAAGACTTGTTT<br>CC   |
| 12          | 25378499  | 25378910  | KRAS_1_+    | 4           | 1413                         | GAAACCTTAGGAAGTTCAGTGCAGAGA        | TAGTGACAGCCAGCCTCAGGGCAATTG<br>T   |
| 12          | 25380234  | 25380683  | KRAS_2_+    | 3           | 926                          | CCTGAGAACATCAGAACCTTTCTGCAT        | TCTGGATGGTTTTGGGAACGTCAATAT        |
| 12          | 25398208  | 25398635  | KRAS_3_+    | 2           | 2064                         | CCAGCAATGCACAAAGATTCAGTGTG         | AATGAGGGACCACTACATGAGGACTG         |
| 12          | 112888116 | 112888551 | PTPN11_1_+  | 3           | 2576                         | TAGAGCTGAGAAGCCTTCGGGGAGTA<br>A    | CCACTTTGTAGATGAATATGATCCAC         |
| 12          | 112926839 | 112927258 | PTPN11_2_+  | 13          | 1053                         | ATGCAACCCTATAGGATGAGTGTAAAG        | GTGGGTGACAGCTCCATTTCTCTAAA         |
| 13          | 28592577  | 28593002  | FLT3_1_+    | 20          | 1381                         | GCAGAACAGCAGTCTGGCTATTTAGAT        | TGTGGACGAATATGATCCAACAATAGA        |
| 13          | 28608193  | 28608596  | FLT3_2_+    | 13+14       | 1051                         | CTTTTGTCTCGGAATCTGCAAAAGATCT       | TGTGAGGCTGCTATTTCTACTTATTT         |
| 13          | 28610091  | 28610494  | FLT3_3_+    | 11          | 172                          | AATGTCACACAGGAATTCTGTTTCATC        | TGTAAGAATGGAATGTGCCAAATGTT         |

|    |          |          |            |       |      |                                |                                |
|----|----------|----------|------------|-------|------|--------------------------------|--------------------------------|
| 15 | 38545247 | 38545694 | SPRED1_1_+ | 1     | 529  | GCAATCATTGTGCTTTTTAGAACTGAA    | GCCAAACATGAGAGACACATATTTCTCTTT |
| 15 | 38591535 | 38591950 | SPRED1_2_+ | 2     | 1906 | CTTCCATCCATCCACATTATCCCTCT     | ACAGGGGCCTCACCATGGTGGATGC      |
| 15 | 38614381 | 38614826 | SPRED1_3_+ | 3     | 293  | CCCATCCCCAACAAATGTGTATCAAT     | GCAAAGATCAGGAATTAGCTTTTCCAT    |
| 15 | 38643086 | 38643489 | SPRED1_4_+ | 7     | 3114 | CATGCAATTGACATAGACTATGATGTG    | ACATATATCAAATGCATCTAATGTAGCTC  |
| 15 | 38643358 | 38643759 | SPRED1_5_+ | 7     | 3957 | ATTTTTAATGAGGAAGGCTGCGTCTTA    | TTCTGGACATTTCTATGATATGTTTTTG   |
| 15 | 38643684 | 38644084 | SPRED1_6_+ | 7     | 1655 | GATTCCAGTATTCAGTTTTCTAAACCAGAC | CTTGCGATGGTTAGCCCTGGTAGCTTT    |
| 15 | 66727334 | 66727751 | MAP2K1_1_+ | 2     | 434  | CTGCAAATACTCTACAACCTGTAACAAAAC | GTACACGAACAGGGATCAGAAAAATCT    |
| 15 | 66729037 | 66729486 | MAP2K1_2_+ | 3     | 529  | TATTGACTTGTGCTCCCCACTTTGGA     | TTGCCAGGCTGGTGTGCAACCTCCAT     |
| 17 | 29528006 | 29528443 | NF1_1_+    | 10    | 1085 | TTCCCTAAATTTAGAACCGAGCAGTCA    | CTCCCAGTAGCCGGGACCACAGGCAT     |
| 17 | 29652753 | 29653190 | NF1_2_+    | 37    | 2647 | CTGAGCCAGGCAGATCTATAGAAAAAG    | ACAAAAGCCTTTAAATACCCATGCAGT    |
| 17 | 29654472 | 29654917 | NF1_3_+    | 38    | 4061 | CATAAAATAAAATTGATTAGTGGCATCTGT | GAACAACAGAAACTACCTGCTGCCA      |
| 17 | 29677138 | 29677547 | NF1_4_+    | 50    | 2071 | GGTCTCATTTTTAAAGCAACAAACCCC    | CGGGGTGAAGTGAGAAGAATTAACCT     |
| 19 | 4099156  | 4099558  | MAP2K2_1_+ | 7     | 179  | TGAGCACTGGGACACGTTTCTGTGTG     | AACAGAGCATGTTGGGAGAGAAGGAAG    |
| 19 | 4110438  | 4110845  | MAP2K2_2_+ | 3     | 775  | GGATCCTTCTCTACACCATGAACC       | AGTGGTGGGGAAGGTCCCCCTGGAAA     |
| 19 | 4117360  | 4117773  | MAP2K2_3_+ | 2     | 1255 | AACTATGAGAGGTGCTCTAGGTACACC    | AGAGAGGTTTTATGAAAGAAAGAGGGA    |
| X  | 47426580 | 47427029 | ARAF_1_+   | 10    | 454  | CTGCATGATCACAGGTCCTCTAAACAT    | ATCTAAGAGGCCTGCCACATCCCTCAT    |
| X  | 47428072 | 47428517 | ARAF_2_+   | 11+12 | 61   | CTTTTGAGAGAGATACAAGTTTCTGT     | ACAGATCTGTTTTCTGCAAAATCATAA    |
| X  | 47428811 | 47429228 | ARAF_3_+   | 13    | 420  | TTGTAATCCAGAACCCCAAGAG         | AGTGTGAGAGGTGGGAGGAAAAATAG     |
| X  | 47429159 | 47429559 | ARAF_4_+   | 14    | 287  | AGATCCCCTGCCCACACAGGGTAC       | ATCCTGACCAGGAGCCCTTAATATCA     |
| X  | 47430152 | 47430552 | ARAF_5_+   | 15    | 220  | GTCTGGACTCCTCATGTCCACCT        | AACCTAAAATTTCTAGGATAAGGACTCCC  |
| X  | 47430424 | 47430824 | ARAF_6_+   | 16    | 527  | CTCATGGTGAAACACACACACACA       | AGCTGGGGTACTGTGAGTATCAAGG      |
| X  | 47430758 | 47431158 | ARAF_7_+   | 16    | 360  | GGGGCTGGACACCTTGGGTGGGTGACT    | CCCAGGCCGATGAGTTGCCTGCCT       |



167 **Supplemental Table S2: Estimate of false negative cases missed due to low coverage in the 8 most frequently**  
 168 **mutated regions.** The frequency of 1-3%VAF mutations, 3-5% VAF mutations, and 5-10%VAF mutations was  
 169 calculated in a set of samples with sufficient coverage (>2000rds). This frequency was used to estimate the number  
 170 of cases that would be expected in the group of cases where coverage was below the required minimum. All  
 171 missed cases in these three groups were summed up. WT: Wildtype for RAS pathway mutations.

Estimated number of <3%VAF mutations missed in cases with a coverage <666, based on the frequency of 1-3%VAF mutations observed in a group that did reach the coverage of >2000

| amplicon      | cases with enough coverage | mutation frequency VAF 1-3% | WT cases with coverage <666 | Estimate missed cases |
|---------------|----------------------------|-----------------------------|-----------------------------|-----------------------|
| NRAS_1_+      | 210                        | 10.5                        | 20                          | 2                     |
| KRAS_1_+      | 118                        | 2.5                         | 57                          | 1                     |
| KRAS_2_+      | 10                         | 0.0                         | 59                          | 0                     |
| KRAS_3_+      | 248                        | 4.8                         | 20                          | 1                     |
| PTPN11_1_+    | 327                        | 2.4                         | 9                           | 0                     |
| PTPN11_2_+    | 32                         | 0.0                         | 41                          | 0                     |
| FLT3_1_+      | 95                         | 4.2                         | 24                          | 1                     |
| FLT3_2_+      | 40                         | 0.0                         | 46                          | 0                     |
| ΣMissed cases |                            |                             |                             | 6                     |

172

Estimated number of 5-10%VAF mutations missed in cases with a coverage <200, based on the frequency of 5-10%VAF mutations observed in a group that did reach the coverage of >2000

| amplicon     | cases with enough coverage | mutation frequency VAF 5-10% | WT cases with coverage < 200 | Estimate missed cases |
|--------------|----------------------------|------------------------------|------------------------------|-----------------------|
| NRAS_1_+     | 446                        | 4.7                          | 8                            | 0                     |
| KRAS_1_+     | 396                        | 0.3                          | 28                           | 0                     |
| KRAS_2_+     | 437                        | 0.0                          | 5                            | 0                     |
| KRAS_3_+     | 448                        | 4.5                          | 7                            | 0                     |
| PTPN11_1_+   | 454                        | 0.4                          | 2                            | 0                     |
| PTPN11_2_+   | 427                        | 0.0                          | 3                            | 0                     |
| FLT3_1_+     | 443                        | 0.5                          | 11                           | 0                     |
| FLT3_2_+     | 432                        | 0.5                          | 16                           | 0                     |
| Missed cases |                            |                              |                              | 1                     |

173

Estimated number of 3-5%VAF mutations missed in cases with a coverage < 400, based on the frequency of 3-5%VAF mutations observed in a group that did reach the coverage of >2000

| amplicon     | cases with enough cov | mutation frequency of VAF 3-5% | WT cases with coverage <400 | Estimate missed cases |
|--------------|-----------------------|--------------------------------|-----------------------------|-----------------------|
| NRAS_1_+     | 210                   | 3.8                            | 12                          | 0                     |
| KRAS_1_+     | 118                   | 1.7                            | 35                          | 1                     |
| KRAS_2_+     | 10                    | 0.0                            | 16                          | 0                     |
| KRAS_3_+     | 248                   | 2.0                            | 10                          | 0                     |
| PTPN11_1_+   | 327                   | 0.6                            | 6                           | 0                     |
| PTPN11_2_+   | 32                    | 0.0                            | 18                          | 0                     |
| FLT3_1_+     | 95                    | 0.0                            | 13                          | 0                     |
| FLT3_2_+     | 40                    | 0.0                            | 21                          | 0                     |
| Missed cases |                       |                                |                             | 2                     |

174

175

176 **Supplemental Table S3: Frequency and total number of clonal and subclonal RAS pathway mutations per subtype and gene.** WT: Wildtype, n: number of  
 177 cases, 1-10: mutations with 1 to 10% VAF, 50+: 50 to 100% VAF, all: all mutations summed up. ER: ETV6-RUNX1-rearranged; MLL: t(4;11)-rearranged, HD: high  
 178 hyperdiploid, BO: B-other, TCF3: TCF3-rearranged, BA: BCR-ABL1-rearranged, BAL: BCR-ABL1-like.

|         |        | total n tested | Wildtype |            | 1-10% |            | 10-20% |            | 20-30% |            | 30-40% |            | 40-50% |            | >50% |            | all |            |
|---------|--------|----------------|----------|------------|-------|------------|--------|------------|--------|------------|--------|------------|--------|------------|------|------------|-----|------------|
|         |        |                | n        | % of total | n     | % of total | n      | % of total | n      | % of total | n      | % of total | n      | % of total | n    | % of total | n   | % of total |
| ER      | KRAS   | 124            | 107      | 86.3       | 6     | 4.8        | 3      | 2.4        | 1      | 0.8        | 5      | 4.0        | 2      | 1.6        | 0    | 0.0        | 17  | 13.7       |
|         | NRAS   | 124            | 110      | 88.7       | 10    | 8.1        | 0      | 0.0        | 1      | 0.8        | 2      | 1.6        | 0      | 0.0        | 1    | 0.8        | 13  | 10.5       |
|         | FLT3   | 124            | 119      | 96.0       | 4     | 3.2        | 0      | 0.0        | 0      | 0.0        | 0      | 0.0        | 1      | 0.8        | 0    | 0.0        | 5   | 4.0        |
|         | PTPN11 | 124            | 120      | 96.8       | 3     | 2.4        | 0      | 0.0        | 0      | 0.0        | 1      | 0.8        | 0      | 0.0        | 0    | 0.0        | 4   | 3.2        |
|         | other  | 124            | 122      | 98.4       | 2     | 1.6        | 0      | 0.0        | 0      | 0.0        | 0      | 0.0        | 0      | 0.0        | 0    | 0.0        | 2   | 1.6        |
| t(4;11) | KRAS   | 15             | 9        | 60.0       | 3     | 20.0       | 1      | 6.7        | 0      | 0.0        | 2      | 13.3       | 0      | 0.0        | 0    | 0.0        | 6   | 40.0       |
|         | NRAS   | 15             | 9        | 60.0       | 2     | 13.3       | 3      | 20.0       | 1      | 6.7        | 0      | 0.0        | 0      | 0.0        | 0    | 0.0        | 6   | 40.0       |
|         | FLT3   | 15             | 13       | 86.7       | 1     | 6.7        | 0      | 0.0        | 1      | 6.7        | 0      | 0.0        | 0      | 0.0        | 0    | 0.0        | 2   | 13.3       |
|         | PTPN11 | 15             | 13       | 86.7       | 2     | 13.3       | 0      | 0.0        | 0      | 0.0        | 0      | 0.0        | 0      | 0.0        | 0    | 0.0        | 2   | 13.3       |
|         | other  | 15             | 15       | 100.0      | 0     | 0.0        | 0      | 0.0        | 0      | 0.0        | 0      | 0.0        | 0      | 0.0        | 0    | 0.0        | 0   | 0.0        |
| HD      | KRAS   | 124            | 69       | 55.6       | 19    | 15.3       | 7      | 5.6        | 10     | 8.1        | 7      | 5.6        | 12     | 9.7        | 0    | 0.0        | 55  | 44.4       |
|         | NRAS   | 124            | 82       | 66.1       | 18    | 14.5       | 5      | 4.0        | 8      | 6.5        | 4      | 3.2        | 6      | 4.8        | 1    | 0.8        | 41  | 33.1       |
|         | FLT3   | 124            | 110      | 88.7       | 5     | 4.0        | 4      | 3.2        | 1      | 0.8        | 0      | 0.0        | 2      | 1.6        | 2    | 1.6        | 12  | 9.7        |
|         | PTPN11 | 124            | 110      | 88.7       | 4     | 3.2        | 4      | 3.2        | 1      | 0.8        | 1      | 0.8        | 4      | 3.2        | 0    | 0.0        | 14  | 11.3       |
|         | other  | 124            | 122      | 98.4       | 0     | 0.0        | 0      | 0.0        | 1      | 0.8        | 0      | 0.0        | 0      | 0.0        | 1    | 0.8        | 1   | 0.8        |
| BO      | KRAS   | 67             | 52       | 77.6       | 6     | 9.0        | 2      | 3.0        | 1      | 1.5        | 2      | 3.0        | 3      | 4.5        | 1    | 1.5        | 14  | 20.9       |
|         | NRAS   | 67             | 48       | 71.6       | 7     | 10.4       | 3      | 4.5        | 1      | 1.5        | 4      | 6.0        | 3      | 4.5        | 1    | 1.5        | 18  | 26.9       |
|         | FLT3   | 67             | 62       | 92.5       | 4     | 6.0        | 0      | 0.0        | 0      | 0.0        | 1      | 1.5        | 0      | 0.0        | 0    | 0.0        | 5   | 7.5        |
|         | PTPN11 | 67             | 65       | 97.0       | 2     | 3.0        | 0      | 0.0        | 0      | 0.0        | 0      | 0.0        | 0      | 0.0        | 0    | 0.0        | 2   | 3.0        |
|         | other  | 67             | 66       | 98.5       | 1     | 1.5        | 0      | 0.0        | 0      | 0.0        | 0      | 0.0        | 0      | 0.0        | 0    | 0.0        | 1   | 1.5        |
| TCF3    | KRAS   | 26             | 25       | 96.2       | 0     | 0.0        | 1      | 3.8        | 0      | 0.0        | 0      | 0.0        | 0      | 0.0        | 0    | 0.0        | 1   | 3.8        |
|         | NRAS   | 26             | 25       | 96.2       | 1     | 3.8        | 0      | 0.0        | 0      | 0.0        | 0      | 0.0        | 0      | 0.0        | 0    | 0.0        | 1   | 3.8        |
|         | FLT3   | 26             | 26       | 100.0      | 0     | 0.0        | 0      | 0.0        | 0      | 0.0        | 0      | 0.0        | 0      | 0.0        | 0    | 0.0        | 0   | 0.0        |
|         | PTPN11 | 26             | 26       | 100.0      | 0     | 0.0        | 0      | 0.0        | 0      | 0.0        | 0      | 0.0        | 0      | 0.0        | 0    | 0.0        | 0   | 0.0        |
|         | other  | 26             | 26       | 100.0      | 0     | 0.0        | 0      | 0.0        | 0      | 0.0        | 0      | 0.0        | 0      | 0.0        | 0    | 0.0        | 0   | 0.0        |
| BA      | KRAS   | 26             | 26       | 100.0      | 0     | 0.0        | 0      | 0.0        | 0      | 0.0        | 0      | 0.0        | 0      | 0.0        | 0    | 0.0        | 0   | 0.0        |
|         | NRAS   | 26             | 26       | 100.0      | 0     | 0.0        | 0      | 0.0        | 0      | 0.0        | 0      | 0.0        | 0      | 0.0        | 0    | 0.0        | 0   | 0.0        |
|         | FLT3   | 26             | 25       | 96.2       | 0     | 0.0        | 0      | 0.0        | 0      | 0.0        | 0      | 0.0        | 1      | 3.8        | 0    | 0.0        | 1   | 3.8        |
|         | PTPN11 | 26             | 26       | 100.0      | 0     | 0.0        | 0      | 0.0        | 0      | 0.0        | 0      | 0.0        | 0      | 0.0        | 0    | 0.0        | 0   | 0.0        |
|         | other  | 26             | 26       | 100.0      | 0     | 0.0        | 0      | 0.0        | 0      | 0.0        | 0      | 0.0        | 0      | 0.0        | 0    | 0.0        | 0   | 0.0        |
| BAL     | KRAS   | 79             | 61       | 77.2       | 7     | 8.9        | 1      | 1.3        | 3      | 3.8        | 3      | 3.8        | 3      | 3.8        | 1    | 1.3        | 17  | 21.5       |
|         | NRAS   | 79             | 58       | 73.4       | 9     | 11.4       | 2      | 2.5        | 0      | 0.0        | 2      | 2.5        | 7      | 8.9        | 1    | 1.3        | 20  | 25.3       |
|         | FLT3   | 79             | 72       | 91.1       | 2     | 2.5        | 1      | 1.3        | 2      | 2.5        | 0      | 0.0        | 1      | 1.3        | 1    | 1.3        | 6   | 7.6        |
|         | PTPN11 | 79             | 72       | 91.1       | 3     | 3.8        | 0      | 0.0        | 1      | 1.3        | 0      | 0.0        | 3      | 3.8        | 0    | 0.0        | 7   | 8.9        |
|         | other  | 79             | 78       | 98.7       | 1     | 1.3        | 0      | 0.0        | 0      | 0.0        | 0      | 0.0        | 0      | 0.0        | 0    | 0.0        | 1   | 1.3        |

180 **Table S4: Frequencies of RAS pathway mutations among cytogenetic subtypes of BCP-ALL.** Fisher's Exact test  
 181 comparing the frequency of each cytogenetic subtype to the remaining BCP-ALL subtypes. ER: ETV6-RUNX1-  
 182 rearranged, MLL: t(4;11)-rearranged, HD: high hyperdiploid karyotype, BO: B-other, TCF3: TCF3-rearranged, BA:  
 183 BCR-ABL1-rearranged, BAL: BCR-ABL1-like gene expression profile. OR: Odds ratio. P-values < 0.05 are printed in  
 184 bold. CI: confidence interval. Values for p < 0.05 are printed in bold.

|       | Wildtype | Mutated | Total | Frequency | Fisher's Exact p-value | OR  | 95% CI of OR |      |
|-------|----------|---------|-------|-----------|------------------------|-----|--------------|------|
| ER    | 96       | 28      | 124   | 22.6%     | <b>8.2E-08</b>         | 0.3 | 0.2          | 0.5  |
| MLL   | 4        | 11      | 15    | 73.3%     | <b>1.8E-02</b>         | 3.8 | 1.1          | 16.8 |
| HD    | 34       | 90      | 124   | 72.6%     | <b>4.7E-15</b>         | 5.7 | 3.5          | 9.3  |
| BO    | 39       | 28      | 67    | 41.8%     | 0.90                   | 1.0 | 0.5          | 1.7  |
| TCF3  | 26       | 0       | 26    | 0.0%      | <b>3.6E-07</b>         | 0.0 | 0.0          | 0.2  |
| BA    | 25       | 1       | 26    | 4.0%      | <b>7.5E-06</b>         | 0.0 | 0.0          | 0.3  |
| BAL   | 40       | 39      | 79    | 49.4%     | 0.21                   | 1.4 | 0.8          | 2.3  |
| total | 264      | 197     | 461   |           |                        |     |              |      |

185

186

187 **Supplemental Table S5: Frequency of common secondary aberrations in RAS pathway wildtype, clonal and subclonal mutation cases.** Genomic data  
 188 obtained by MLPA and array comparative genomic hybridization (aCGH) were available for a subset of patients analysed in this study. The overlap with RAS  
 189 pathway mutations is shown. total: Total number of cases in the analysis and per group. Cases: Cases positive for the respective feature OR: Odds ratio. p: p-  
 190 value. Values for p < 0.05 are printed in bold.

| Feature                    | Total |       |       | RAS pathway wildtype |       |       | clonal RAS pathway mutation |       |       |              |       |          | subclonal RAS pathway mutation |       |       |       |              |      |          |       |
|----------------------------|-------|-------|-------|----------------------|-------|-------|-----------------------------|-------|-------|--------------|-------|----------|--------------------------------|-------|-------|-------|--------------|------|----------|-------|
|                            | total | freq. | cases | total                | freq. | cases | total                       | freq. | cases | p =          | OR    | CI (95%) |                                | total | freq. | cases | p =          | OR   | CI (95%) |       |
| ERG deletion or break      | 272   | 3%    | 8     | 156                  | 3%    | 5     | 70                          | 1%    | 1     | 0.669        | 0.44  | 0.01     | 4.03                           | 46    | 4%    | 2     | 0.659        | 1.37 | 0.13     | 8.73  |
| JAK2 mutation              | 419   | 4%    | 15    | 239                  | 4%    | 9     | 103                         | 1%    | 1     | 0.293        | 0.25  | 0.01     | 1.85                           | 77    | 6%    | 5     | 0.341        | 1.77 | 0.45     | 6.11  |
| high CRLF2 expression      | 407   | 11%   | 45    | 231                  | 9%    | 20    | 102                         | 9%    | 9     | 1.000        | 1.02  | 0.39     | 2.45                           | 75    | 21%   | 16    | <b>0.006</b> | 2.85 | 1.29     | 6.20  |
| chromosome 21 abnormality  | 392   | 42%   | 164   | 224                  | 32%   | 72    | 99                          | 56%   | 55    | <b>0.000</b> | 2.63  | 1.58     | 4.42                           | 69    | 54%   | 37    | <b>0.002</b> | 2.43 | 1.36     | 4.39  |
| Morbus Down                | 392   | 4%    | 14    | 224                  | 5%    | 11    | 99                          | 2%    | 2     | 0.358        | 0.40  | 0.04     | 1.89                           | 69    | 1%    | 1     | 0.306        | 0.29 | 0.01     | 2.03  |
| iAMP21                     | 390   | 4%    | 15    | 222                  | 4%    | 8     | 99                          | 1%    | 1     | 0.284        | 0.27  | 0.01     | 2.09                           | 69    | 9%    | 6     | 0.106        | 2.54 | 0.70     | 8.70  |
| dic(9;20)                  | 390   | 5%    | 19    | 222                  | 2%    | 5     | 99                          | 11%   | 11    | <b>0.002</b> | 5.39  | 1.67     | 20.39                          | 69    | 4%    | 3     | 0.399        | 1.97 | 0.30     | 10.42 |
| 9p deletion                | 390   | 9%    | 34    | 222                  | 4%    | 9     | 99                          | 21%   | 21    | <b>0.000</b> | 6.33  | 2.64     | 16.40                          | 69    | 6%    | 4     | 0.515        | 1.45 | 0.32     | 5.42  |
| PAX5 amplification         | 401   | 1%    | 6     | 231                  | 0%    | 1     | 95                          | 4%    | 4     | <b>0.027</b> | 10.03 | 0.98     | 499                            | 75    | 1%    | 1     | 0.431        | 3.09 | 0.04     | 244   |
| PAX5 del                   | 401   | 26%   | 105   | 231                  | 31%   | 71    | 95                          | 27%   | 26    | 0.595        | 0.85  | 0.48     | 1.48                           | 75    | 11%   | 8     | <b>0.000</b> | 0.27 | 0.11     | 0.60  |
| CDKN2A deletion            | 404   | 33%   | 134   | 232                  | 29%   | 68    | 97                          | 46%   | 45    | <b>0.003</b> | 2.08  | 1.24     | 3.50                           | 75    | 28%   | 21    | 0.884        | 0.94 | 0.50     | 1.72  |
| CDKN2B deletion            | 403   | 32%   | 127   | 231                  | 27%   | 63    | 97                          | 44%   | 43    | <b>0.003</b> | 2.12  | 1.25     | 3.58                           | 75    | 28%   | 21    | 0.883        | 1.04 | 0.55     | 1.91  |
| CDKN2A and CDKN2B wildtype | 403   | 65%   | 260   | 231                  | 69%   | 159   | 97                          | 52%   | 50    | <b>0.004</b> | 0.48  | 0.29     | 0.81                           | 75    | 68%   | 51    | 0.887        | 0.96 | 0.53     | 1.77  |
| IKZF1 deletion             | 400   | 21%   | 84    | 230                  | 25%   | 57    | 95                          | 19%   | 18    | 0.311        | 0.71  | 0.37     | 1.32                           | 75    | 12%   | 9     | <b>0.023</b> | 0.41 | 0.17     | 0.91  |
| BTG1 deletion              | 400   | 10%   | 38    | 229                  | 14%   | 32    | 96                          | 1%    | 1     | <b>0.000</b> | 0.07  | 0.00     | 0.40                           | 75    | 7%    | 5     | 0.106        | 0.44 | 0.13     | 1.20  |
| EBF1 deletion              | 402   | 7%    | 28    | 231                  | 8%    | 19    | 96                          | 4%    | 4     | 0.240        | 0.49  | 0.12     | 1.52                           | 75    | 7%    | 5     | 0.807        | 0.80 | 0.22     | 2.32  |
| ETV6 deletion              | 399   | 25%   | 101   | 227                  | 30%   | 68    | 97                          | 14%   | 14    | <b>0.003</b> | 0.40  | 0.19     | 0.76                           | 75    | 25%   | 19    | 0.467        | 0.79 | 0.41     | 1.48  |
| TCF3 deletion              | 121   | 26%   | 32    | 63                   | 29%   | 18    | 37                          | 24%   | 9     | 0.816        | 0.81  | 0.28     | 2.21                           | 21    | 24%   | 5     | 0.782        | 0.78 | 0.19     | 2.69  |

191

192

**Supplemental Table S6: Distribution of clonal and subclonal RAS pathway mutations among the treatment arms of DCOG ALL10.**

SR: Standard risk treatment arm; MR: medium risk treatment arm; HR: high risk treatment arm. Values for  $p < 0.05$  are printed in bold.

| Within          | Mutated, clonal | Mutated, subclonal |
|-----------------|-----------------|--------------------|
| ALL10 SR        | 10/75 (13%)     | 15/75 (20%)        |
| ALL10 MR        | 33/151 (22%)    | 46/151 (30%)       |
| ALL10 HR        | 9/22 (41%)      | 2/22 (9%)          |
| Fisher test, p= | <b>0.024</b>    | <b>0.047</b>       |

194 **Supplemental Table S7: Clinical characteristics of BCP-ALL patients with subclonal RAS pathway mutations.** WBC:  
 195 White blood cell count; CNS+: non-traumatic puncture and >5 WBC/ $\mu$ l CSF with identifiable leukemic cells; patients  
 196 with a traumatic lumbar puncture were not included; PPR: Prednisone poor responder, i.e.  $\geq 1000$  leukemic  
 197 blasts/ $\mu$ l in peripheral blood on day 8 of induction therapy; MRD high: Minimal residual disease  $\geq 10^{-3}$ ; d33: at the  
 198 end of induction therapy (day 33); d79: at the end of consolidation therapy (day 79); <sup>a</sup>Fisher's Exact test p-values  
 199 <0.05 are printed in bold font; <sup>b</sup>Odds ratios are only given if p-values in Fisher's Exact test were <0.2.

| Risk parameter     | Incidence of subclonal mutations among |                    | Statistics               |                         |        |      |
|--------------------|----------------------------------------|--------------------|--------------------------|-------------------------|--------|------|
|                    | Risk parameter: Yes                    | Risk parameter: No | Fisher's p= <sup>a</sup> | Odds ratio <sup>b</sup> | 95%-CI |      |
| Age $\geq 10$      | 8/75 (15%)                             | 80/357 (30%)       | <b>0.04</b>              | 0.43                    | 0.17   | 0.97 |
| Male               | 49/227 (28%)                           | 39/205 (38%)       | 0.53                     |                         |        |      |
| High WBC (>50/nL)  | 10/99 (15%)                            | 77/331 (30%)       | <b>0.02</b>              | 0.42                    | 0.18   | 0.88 |
| Down Syndrome      | 1/16 (7%)                              | 86/391 (28%)       | 0.12                     | 0.18                    | 0      | 1.26 |
| CNS+               | 0/1 (0%)                               | 38/248 (15%)       | 1                        |                         |        |      |
| PPR                | 2/17 (20%)                             | 63/244 (32%)       | 0.73                     |                         |        |      |
| MRD high d33 ALL10 | 15/48 (45%)                            | 44/191 (23%)       | 0.06                     | 2.24                    | 0.95   | 5.23 |
| MRD high d79 ALL10 | 0/8 (0%)                               | 60/231 (32%)       | 0.18                     | 0                       | 0      | 1.82 |

200

201

202 **Supplemental Table S8: Baseline characteristics of the ALL10 and COALL97/03 cohorts.** WBC: white blood cell  
 203 count; MRD: Minimal residual disease, MRD positive: MRD  $\geq 10^{-3}$ ; PPR: poor prednisone window response. Color  
 204 intensities are used to indicate the treatment intensity. Treatment intensity: COALL treatment arms LR-R and LR-S  
 205 are comparable to ALL10 standard risk treatment (labeled standard); LR-I, HR-R and HR-R are comparable to ALL10  
 206 medium risk treatment (labeled medium, see method section for details).

| ALL10                |        |      |        |       | COALL97/03 |                  |       |      |        |      |      |
|----------------------|--------|------|--------|-------|------------|------------------|-------|------|--------|------|------|
|                      | n      | %    | Median | 25th  | 75th       |                  | n     | %    | Median | 25th | 75th |
| Total                | 244    | 100% |        |       |            | Total            | 131   | 100% |        |      |      |
| Treatment intensity  |        |      |        |       |            |                  |       |      |        |      |      |
| Standard             | 22     | 9%   |        |       |            | Standard         | 31    | 24%  |        |      |      |
| Medium               | 148    | 61%  |        |       |            | Medium           | 100   | 76%  |        |      |      |
| High                 | 74     | 30%  |        |       |            |                  | -     |      |        |      |      |
| Risk characteristics |        |      |        |       |            |                  |       |      |        |      |      |
| Age                  |        |      | 5      | 3     | 8          | Age              |       |      | 4      | 2    | 9    |
| WBC                  |        |      | 11     | 4.925 | 32.15      | WBC              |       |      | 24.1   | 9.47 | 55   |
| MRD positive d33     | 48/239 | 20%  |        |       |            | MRD positive d29 | 20/61 | 33%  |        |      |      |
| MRD positive d79     | 8/239  | 3%   |        |       |            | MRD positive d79 | N/A   |      |        |      |      |
| PPR                  | 15     | 6%   |        |       |            | PPR              | N/A   |      |        |      |      |
| Down S.              | 8      | 3%   |        |       |            | Down S.          | 3/110 | 3%   |        |      |      |
| Events               | 32     | 13%  |        |       |            | Events           | 29    | 22%  |        |      |      |
| Relapse              | 28     | 11%  |        |       |            | Relapse          | 26    | 20%  |        |      |      |

207

208 **Supplemental Table S9: Univariate and multivariate analysis of Cox’s proportional hazard ratio in Standard-risk**  
 209 **treated DCOG ALL10 cases.** WBC: White blood cell count; Clonal mutation: VAF≥25%; subclonal VAF<25%; 95% CI:  
 210 95% confidence interval. Values for p < 0.05 are printed in bold.

| Variable           | Univariate       |              | Multivariate     |              |
|--------------------|------------------|--------------|------------------|--------------|
|                    | HR (95% CI)      | p-value      | HR (95% CI)      | p-value      |
| Age (≥10 years)    | 0.05 (0 - >1000) | 0.66         | 0 (0-∞)          | 0.99         |
| WBC (≥ 50/nL)      | 1.1 (0.1-9.2)    | 0.91         | 0.7 (0.08 – 5.9) | 0.73         |
| RAS pathway status |                  | 0.11         |                  | 0.074        |
| Clonal             | 4.6 (1.0 – 21)   | <b>0.047</b> | 5.4 (1.2 - 25)   | <b>0.032</b> |
| subclonal          | 0.9 (0.1 – 7.8)  | 0.9          | 0.9 (0.1 – 7.7)  | 0.9          |

211



212 **Supplemental Table S10: Median ex vivo LC50-values per RAS pathway mutations.** The allocated group is determined by the  
 213 largest clone. LC50-values are given in IU/mL for L-asparaginase and in µg/mL for all other chemotherapeutic agents. p-value is  
 214 determined with a Mann-Whitney U test. Significant p-values are depicted in red. wt: wildtype, Combined: all RAS pathway  
 215 mutations taken together. PRED: Prednisolone, VCR: Vincristine, ASP: L-asparaginase, DNR: Daunorubicine, 6TG: 6-Thioguanine,  
 216 6MP: 6-Mercaptopurine. Values containing ≥ or ≤ represent the highest or lowest concentration in the range, which was used as  
 217 IC50 if limits were exceeded.

|                 | Clonal |             |              |              |             |         | Subclonal |             |              |              |             |         |
|-----------------|--------|-------------|--------------|--------------|-------------|---------|-----------|-------------|--------------|--------------|-------------|---------|
|                 | n =    | Median LC50 | Min. (µg/mL) | Max. (µg/mL) | Fold change | p-Value | n =       | Median LC50 | Min. (µg/mL) | Max. (µg/mL) | Fold change | p-Value |
| PRED wildtype   | 111    | 0.10        | ≤0.0076      | ≥250         | .           | .       | 111       | 0.10        | ≤0.0076      | ≥250         | .           | .       |
| PRED combined   | 49     | 0.32        | ≤0.0076      | ≥250         | 3.2         | 0.02    | 34        | 0.17        | ≤0.0076      | ≥250         | 1.7         | 0.34    |
| PRED KRAS G13   | 8      | >250        | 0.280        | ≥250         | >2000       | 0.00    | 7         | >250        | 0.06         | ≥250         | >2000       | 0.01    |
| PRED KRAS G12   | 15     | 0.25        | 0.025        | ≥250         | 2.5         | 0.19    | 6         | 0.35        | 0.04         | ≥250         | 3.4         | 0.37    |
| PRED NRAS G13   | 6      | 1.47        | 0.041        | ≥250         | 14.4        | 0.18    | 0         | NA          |              |              | .           | .       |
| PRED NRAS G12   | 11     | 0.23        | ≤0.0076      | 154.89       | 2.2         | 0.37    | 13        | 0.06        | 0.01         | ≥250         | 0.6         | 0.98    |
| PRED FLT3       | 3      | 0.10        | 0.028        | 14.84        | 1           | 1       | 5         | 0.55        | 0.16         | ≥250         | 5.4         | 0.06    |
| PRED PTPN11     | 4      | 0.10        | ≤0.0076      | ≥250         | 1           | 0.66    | 2         | 159.24      | 68.48        | ≥250         | 1565.8      | 0.06    |
| PRED KRAS other | 2      | 0.03        | 0.015        | 0.05         | 0.3         | 0.22    | 1         | 0.36        | 0.36         | 0.36         | 3.5         | 0.54    |
| VCR wildtype    | 110    | 0.49        | ≤0.049       | 44.68        | .           | .       | 110       | 0.49        | ≤0.049       | 44.68        | .           | .       |
| VCR combined    | 49     | 0.73        | ≤0.049       | ≥50          | 1.5         | 0.15    | 35        | 0.50        | ≤0.049       | >50          | 1           | 0.91    |
| VCR KRAS G13    | 8      | 7.09        | 0.397        | 43.95        | 14.6        | 0.01    | 7         | 0.67        | 0.12         | >50          | 1.4         | 0.33    |
| VCR KRAS G12    | 15     | 0.77        | ≤0.049       | ≥50          | 1.6         | 0.21    | 6         | 0.51        | ≤0.049       | 2.26         | 1           | 0.77    |
| VCR NRAS G13    | 6      | 1.44        | 0.191        | 36.50        | 3           | 0.07    | 0         | NA          |              |              | .           | .       |
| VCR NRAS G12    | 11     | 0.09        | ≤0.049       | 3.03         | 0.2         | 0.06    | 14        | 0.45        | ≤0.049       | 2.66         | 0.9         | 0.86    |
| VCR FLT3        | 3      | 0.05        | ≤0.049       | 2.03         | 0.1         | 0.21    | 5         | 0.41        | ≤0.049       | 1.65         | 0.8         | 0.95    |
| VCR PTPN11      | 4      | 2.48        | 0.488        | 43.38        | 5.1         | 0.04    | 2         | 3.41        | 0.10         | 6.72         | 7           | 0.94    |
| VCR KRAS other  | 2      | 0.32        | 0.157        | 0.48         | 0.7         | 0.50    | 1         | 1.51        | 1.51         | 1.51         | 3.1         | 0.37    |
| ASP wildtype    | 109    | 0.22        | ≤0.003       | ≥10          | .           | .       | 109       | 0.22        | ≤0.003       | ≥10          | .           | .       |
| ASP combined    | 49     | 0.04        | ≤0.003       | ≥10          | 0.2         | 0.18    | 35        | 0.07        | ≤0.003       | ≥10          | 0.3         | 0.48    |
| ASP KRAS G13    | 8      | 0.06        | ≤0.003       | 1.58         | 0.3         | 0.55    | 7         | 0.13        | ≤0.003       | ≥10          | 0.6         | 0.86    |
| ASP KRAS G12    | 15     | 0.03        | ≤0.003       | ≥10          | 0.1         | 0.56    | 6         | 0.05        | ≤0.003       | 1.68         | 0.2         | 0.51    |
| ASP NRAS G13    | 6      | 0.87        | 0.009        | 1.98         | 3.9         | 0.52    | 0         | NA          |              |              | .           | .       |
| ASP NRAS G12    | 11     | 0.02        | ≤0.003       | 1.58         | 0.1         | 0.21    | 14        | 0.01        | ≤0.003       | ≥10          | 0.1         | 0.09    |
| ASP FLT3        | 3      | 0.10        | ≤0.003       | 0.13         | 0.4         | 0.36    | 5         | 0.03        | 0.01         | 0.27         | 0.1         | 0.33    |
| ASP PTPN11      | 4      | 0.56        | ≤0.003       | 1.31         | 2.5         | 0.72    | 2         | 0.01        | 0.01         | 0.02         | 0.1         | 0.23    |
| ASP KRAS other  | 2      | 0.01        | 0.010        | 0.01         | 0.1         | 0.14    | 1         | 0.01        | 0.01         | 0.01         | 0.1         | 0.31    |
| DNR wildtype    | 109    | 0.05        | ≤0.002       | 0.32         | .           | .       | 109       | 0.05        | ≤0.002       | 0.32         | .           | .       |
| DNR combined    | 48     | 0.03        | ≤0.002       | 1.13         | 0.5         | 0.64    | 34        | 0.05        | ≤0.002       | 1.18         | 1           | 0.79    |
| DNR KRAS G13    | 8      | 0.09        | 0.018        | 0.25         | 1.7         | 0.15    | 7         | 0.03        | 0.02         | 0.42         | 0.6         | 0.66    |
| DNR KRAS G12    | 15     | 0.03        | ≤0.002       | 1.13         | 0.6         | 0.87    | 6         | 0.05        | 0.01         | 0.15         | 0.9         | 0.82    |
| DNR NRAS G13    | 6      | 0.03        | 0.020        | 0.10         | 0.5         | 0.36    | 0         | NA          |              |              | .           | .       |
| DNR NRAS G12    | 11     | 0.02        | 0.007        | 0.12         | 0.4         | 0.14    | 14        | 0.04        | ≤0.002       | 0.22         | 0.8         | 0.67    |
| DNR FLT3        | 3      | 0.02        | 0.006        | 0.27         | 0.4         | 0.59    | 5         | 0.05        | 0.02         | 0.08         | 1           | 0.84    |
| DNR PTPN11      | 3      | 0.19        | ≤0.002       | 0.23         | 3.7         | 0.44    | 1         | 1.18        | 1.18         | 1.18         | 22.9        | 0.09    |
| DNR KRAS other  | 2      | 0.02        | 0.022        | 0.02         | 0.4         | 0.23    | 1         | 0.12        | 0.12         | 0.12         | 2.4         | 0.21    |
| 6TG wildtype    | 83     | 0.00        | ≤0.002       | 0.02         | .           | .       | 83        | 0.00        | ≤0.002       | 0.02         | .           | .       |
| 6TG combined    | 37     | 0.00        | ≤0.002       | ≥0.05        | 1.1         | 0.89    | 25        | 0.00        | ≤0.002       | 0.02         | 0.9         | 0.73    |
| 6TG KRAS G13    | 5      | 0.00        | ≤0.002       | 0.02         | 1.4         | 0.31    | 4         | 0.00        | 0.00         | 0.02         | 0.8         | 0.58    |
| 6TG KRAS G12    | 9      | 0.00        | ≤0.002       | ≥0.05        | 1.3         | 0.40    | 5         | 0.00        | 0.00         | 0.00         | 0.8         | 0.08    |
| 6TG NRAS G13    | 5      | 0.01        | ≤0.002       | 0.01         | 1.8         | 0.80    | 0         | NA          |              |              | .           | .       |
| 6TG NRAS G12    | 11     | 0.00        | ≤0.002       | 0.01         | 0.7         | 0.25    | 12        | 0.00        | ≤0.002       | 0.01         | 0.9         | 0.45    |
| 6TG FLT3        | 3      | 0.01        | ≤0.002       | 0.01         | 1.5         | 0.85    | 2         | 0.01        | 0.01         | 0.01         | 2.8         | 0.03    |
| 6TG PTPN11      | 2      | 0.00        | 0.003        | 0.00         | 1           | 0.81    | 1         | 0.01        | 0.01         | 0.01         | 2.3         | 0.25    |
| 6TG KRAS other  | 2      | 0.00        | ≤0.002       | 0.00         | 0.6         | 0.08    | 1         | 0.00        | ≤0.002       | 0.00         | 0.4         | 0.11    |
| 6MP wildtype    | 82     | 0.09        | ≤0.016       | ≥0.5         | .           | .       | 82        | 0.09        | ≤0.016       | ≥0.5         | .           | .       |
| 6MP combined    | 32     | 0.06        | ≤0.016       | ≥0.5         | 0.7         | 0.07    | 25        | 0.08        | ≤0.016       | ≥0.5         | 0.9         | 0.39    |
| 6MP KRAS G13    | 4      | 0.14        | 0.044        | ≥0.5         | 1.6         | 0.43    | 4         | 0.04        | 0.02         | 0.09         | 0.4         | 0.07    |
| 6MP KRAS G12    | 8      | 0.05        | ≤0.016       | ≥0.5         | 0.5         | 0.15    | 5         | 0.10        | 0.02         | 0.10         | 1.1         | 0.41    |
| 6MP NRAS G13    | 5      | 0.07        | ≤0.016       | ≥0.5         | 0.8         | 0.70    | 0         | NA          |              |              | .           | .       |
| 6MP NRAS G12    | 10     | 0.09        | ≤0.016       | 0.36         | 1           | 0.57    | 12        | 0.03        | ≤0.016       | 0.27         | 0.3         | 0.01    |
| 6MP FLT3        | 1      | 0.04        | 0.038        | 0.04         | 0.4         | 0.22    | 2         | 0.38        | 0.27         | ≥0.5         | 4.3         | 0.05    |
| 6MP PTPN11      | 2      | 0.02        | ≤0.016       | 0.03         | 0.2         | 0.03    | 1         | 0.12        | 0.12         | 0.12         | 1.4         | 0.52    |
| 6MP KRAS other  | 2      | 0.05        | 0.034        | 0.06         | 0.5         | 0.15    | 1         | 0.02        | 0.02         | 0.02         | 0.2         | 0.14    |

219 **Supplemental Figure S1: Diagram with detailed information about the patient cohorts. A** Subtype distribution  
 220 among patients with complete subtype information, used to determine RAS pathway mutation frequency among  
 221 genetic subtypes of BCP-ALL (red) and subtype distribution among cases used to compare clinical characteristics in  
 222 wildtype or RAS pathway mutated patients (green). **B** Treatment protocols of cases used for analysis of clinical  
 223 characteristics (green) and those used for analysis of event-free survival and cumulative incidence of relapse (blue).  
 224 Cases with *ex vivo* drug sensitivity (yellow frame) data were treated in the COALL97/03 and DCOG ALL10 cohorts,  
 225 but only a subset of these cases had data available (n=211). Observation patient: not eligible for follow-up, only  
 226 baseline characteristics analyzed.

A

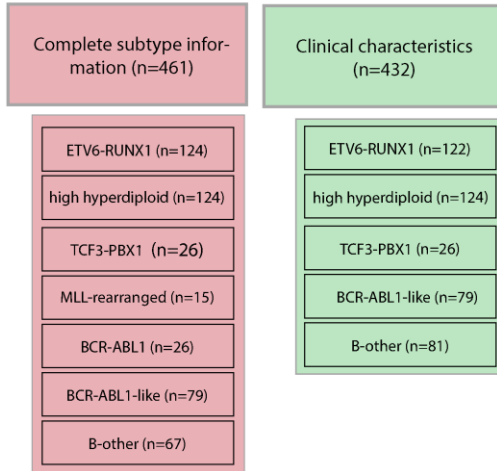

B

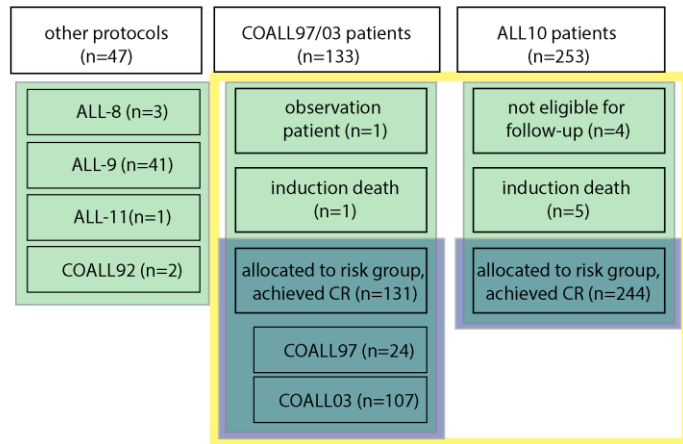

227

228 **Supplemental Figure S2: Amplicon coverage across samples.** Coverage was calculated from the number of reads  
 229 mapped for each sample. Amplicons are identified by their amplicon ID (see also Supplemental Table S1). Boxes  
 230 represent first and third quartile, whiskers represent outer two quartiles (max. 1.5-times the inner quartile range),  
 231 and bar represents group median.

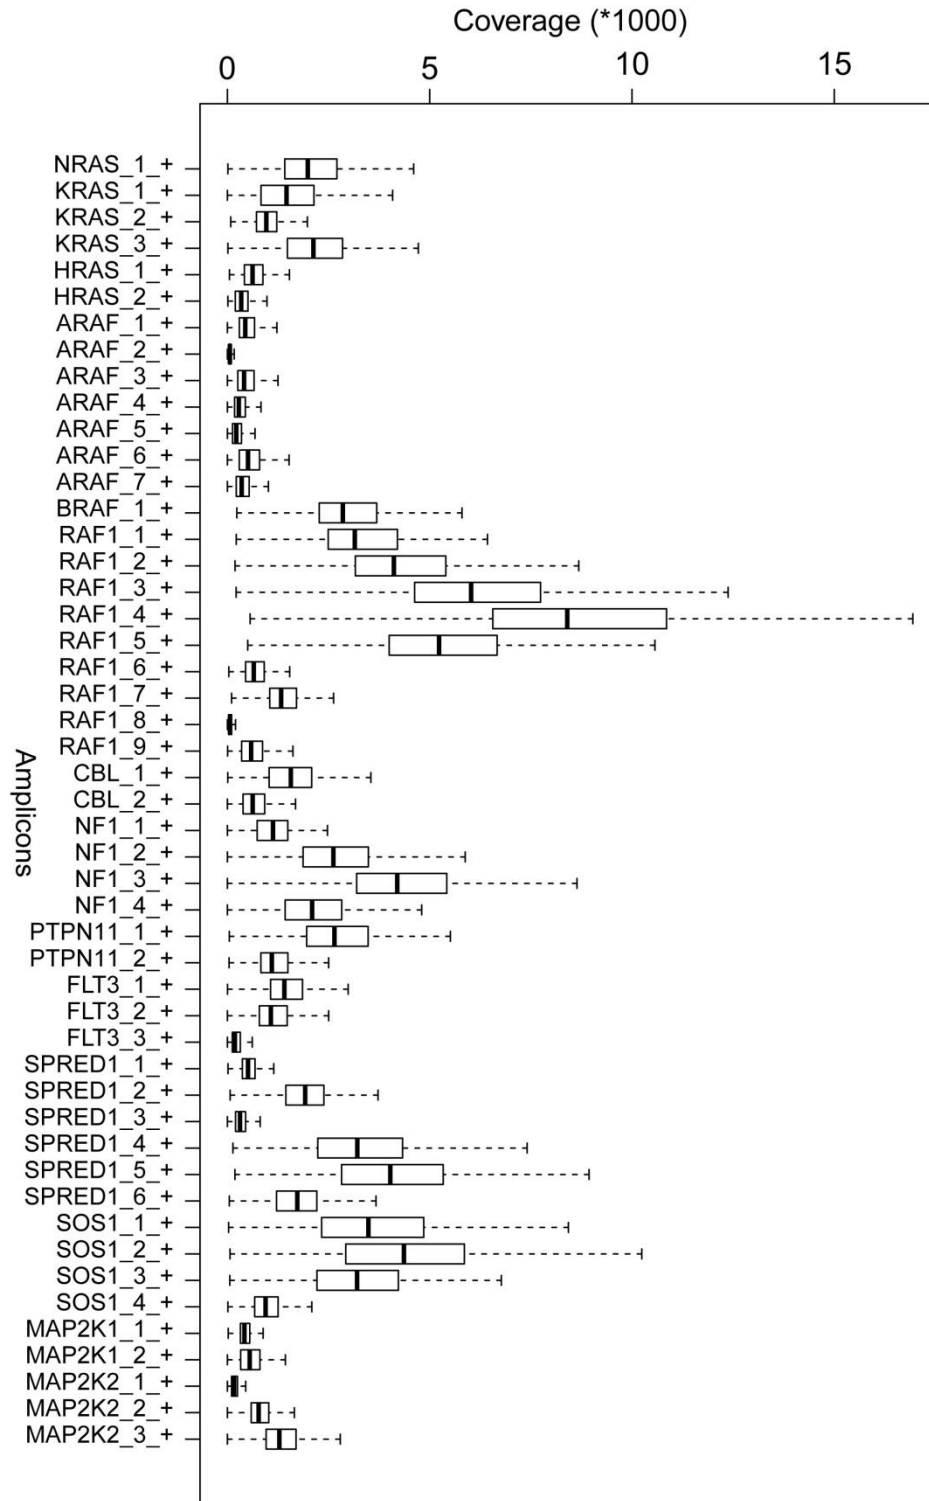

232

233 Supplemental Figure S3: Relative frequency of *NRAS*, *KRAS*, *PTPN11*, *FLT3* and other RAS pathway mutations.

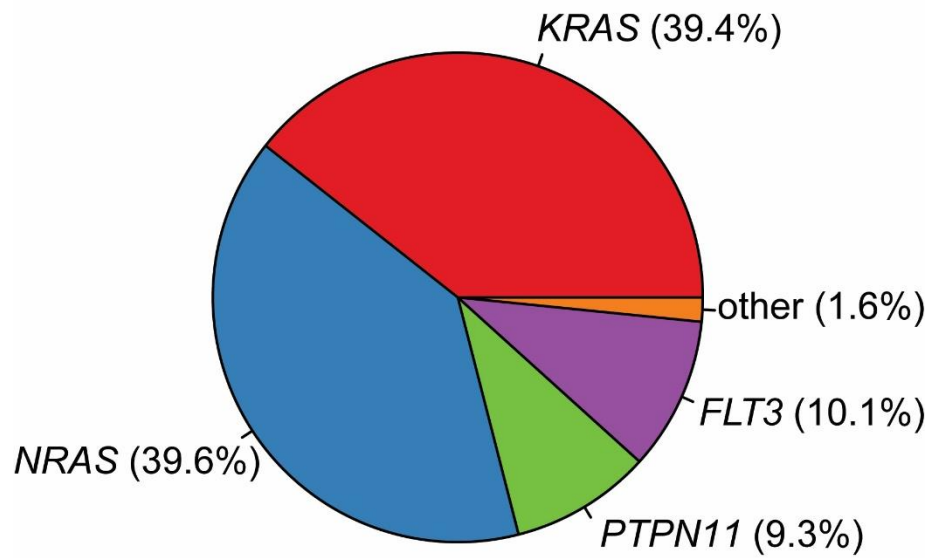

234

235 **Supplemental Figure S4: Histogram of observed variant allele-frequencies.** Histogram of the VAF of all mutations  
236 in RAS pathway genes identified in our dataset. Dashed lines depict median VAF of all clonal or subclonal  
237 mutations. Background shading represents subclonal (light) and (dark) clonal mutations.

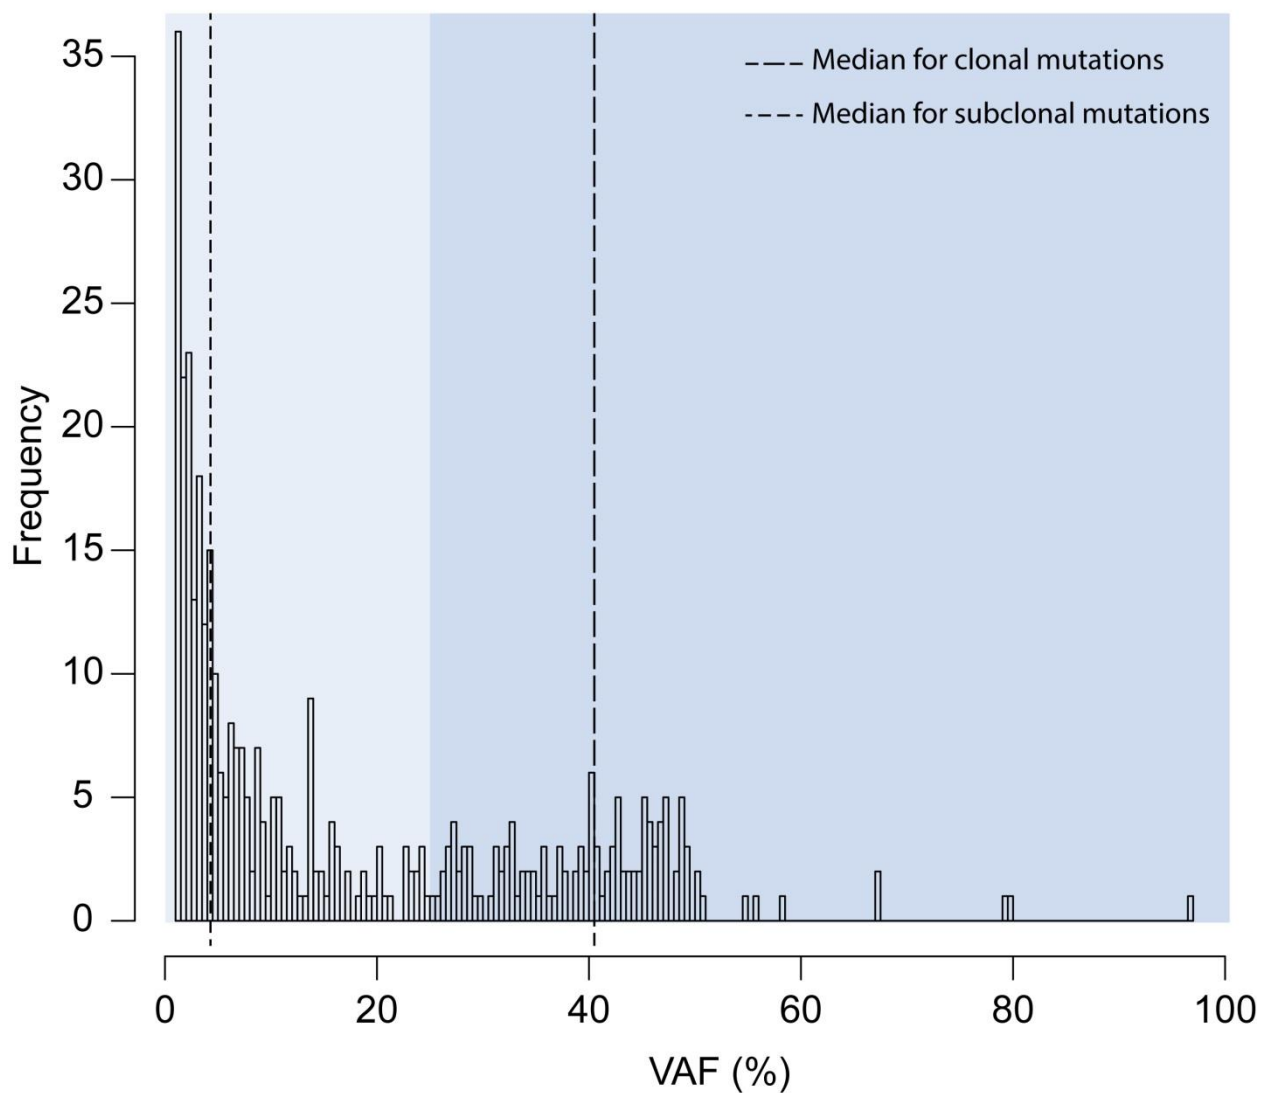

238

239 **Supplemental Figure S5: Frequency of clonal and subclonal RAS pathway mutations among tyrosine kinase (TK)**  
240 **fusion positive *BCR-ABL1*-like cases, *CRLF2*-high *BCR-ABL1*-like cases, and TK fusion negative *BCR-ABL1*-like cases**  
241 **with low *CRLF2* expression.** TK fusions were identified as described by Boer et al. (manuscript submitted) and  
242 included the following fusions: EBF1-PDGFRB (3 cases), PAX5-JAK2 (3), BCR-JAK2 (1), FOXP1-ABL1 (1), SSBP-CSFR (1),  
243 TERF2-JAK2 (1), and ZMIZ1-ABL1 (1). High *CRLF2* expression was, as previously, defined as the 90<sup>th</sup> percentile of the  
244 entire BCP-ALL cohort.

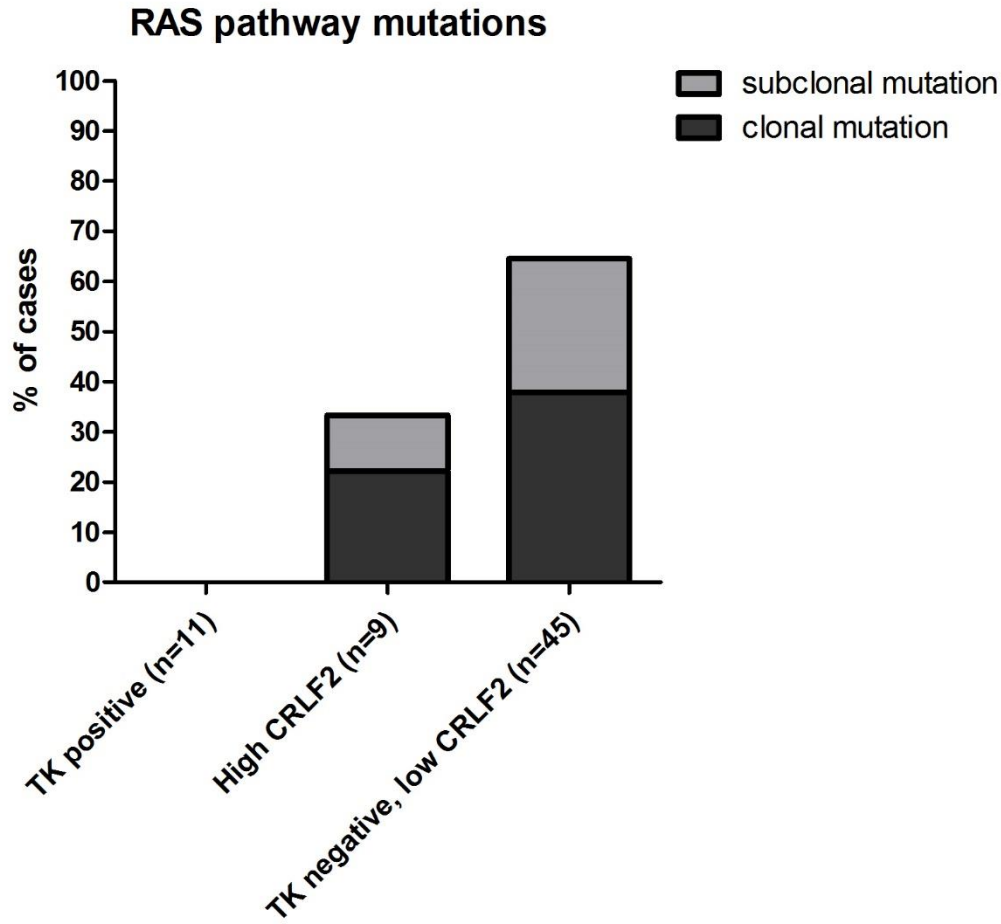

245

246 **Supplemental Figure S6: Overview of amino acid changes in RAS mutated cases.** **A** Relative frequency of different  
 247 *KRAS* and *NRAS* variants observed in pediatric BCP-ALL. **B** Histogram of amino acid substitutions in *KRAS*, *NRAS*, *FLT3*  
 248 and *PTPN11* variants.

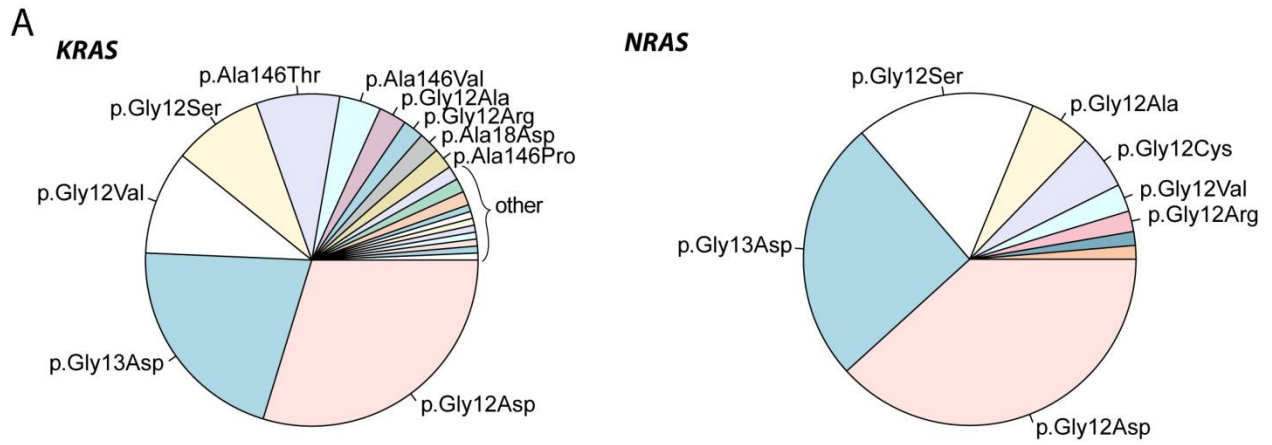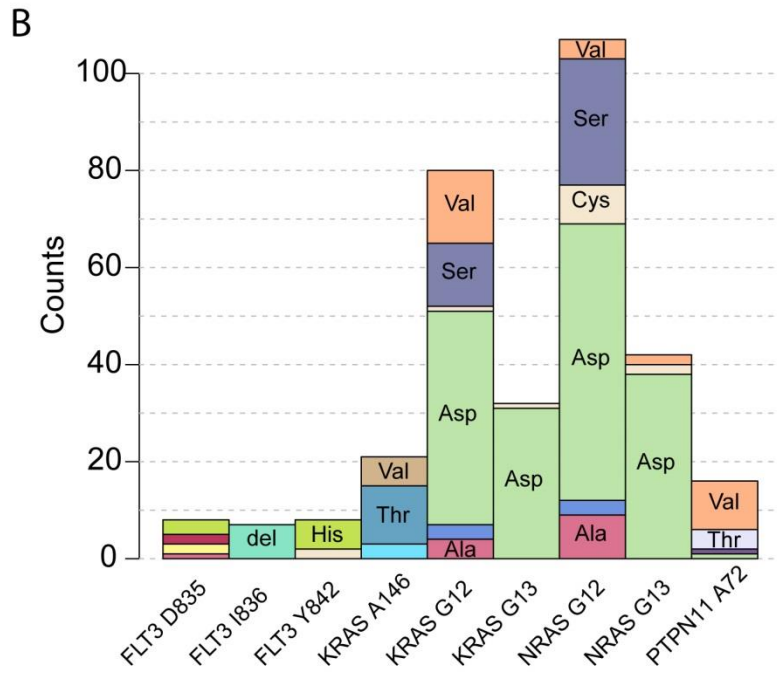

249

250 **Supplemental Figure S7: Event-free survival and cumulative incidence of relapse in the COALL97/03 cohort.**  
 251  $p_{trend}$  = p-value for the analysis comparing wildtype, subclonal, and clonal mutation cases;  $p_{cl}$  = p-value for the  
 252 analysis comparing wildtype to cases with clonal RAS pathway mutations.

Standard risk

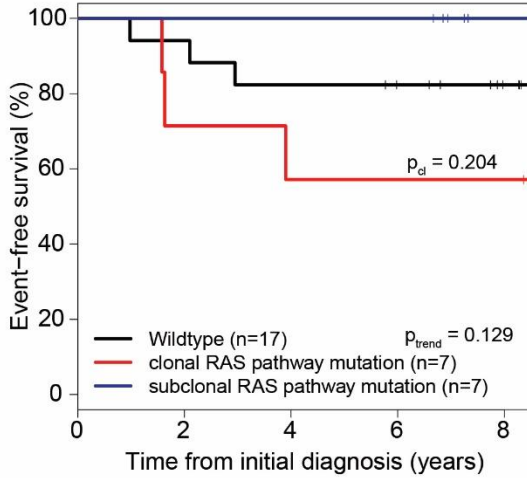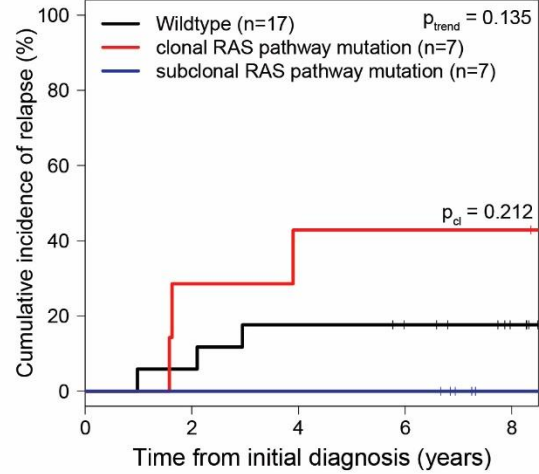

Medium risk

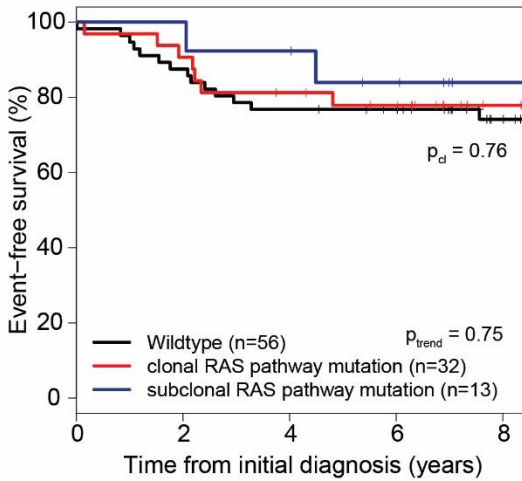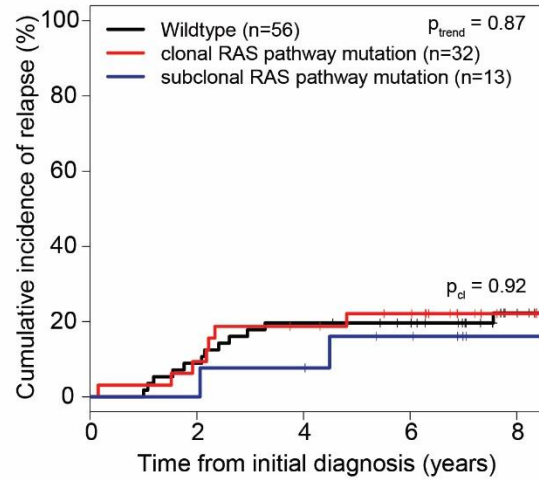

253

254



255 **Supplemental Figure S8: Ex vivo sensitivity to prednisolone and vincristine in BCP-ALL cases carrying subclonal or**  
 256 **clonal RAS pathway mutations including *FLT3* and *PTPN11*.** Sensitivity of primary patient cells towards prednisolone  
 257 and vincristine, distinguished by RAS mutation status. LC50-values of cases with clonal and subclonal mutations are  
 258 depicted. "All": All cases with a mutation in *NRAS*, *KRAS*, *PTPN11*, or *FLT3*. In cases with multiple mutations, the  
 259 mutation with the highest VAF (largest clone) was used to classify cases.

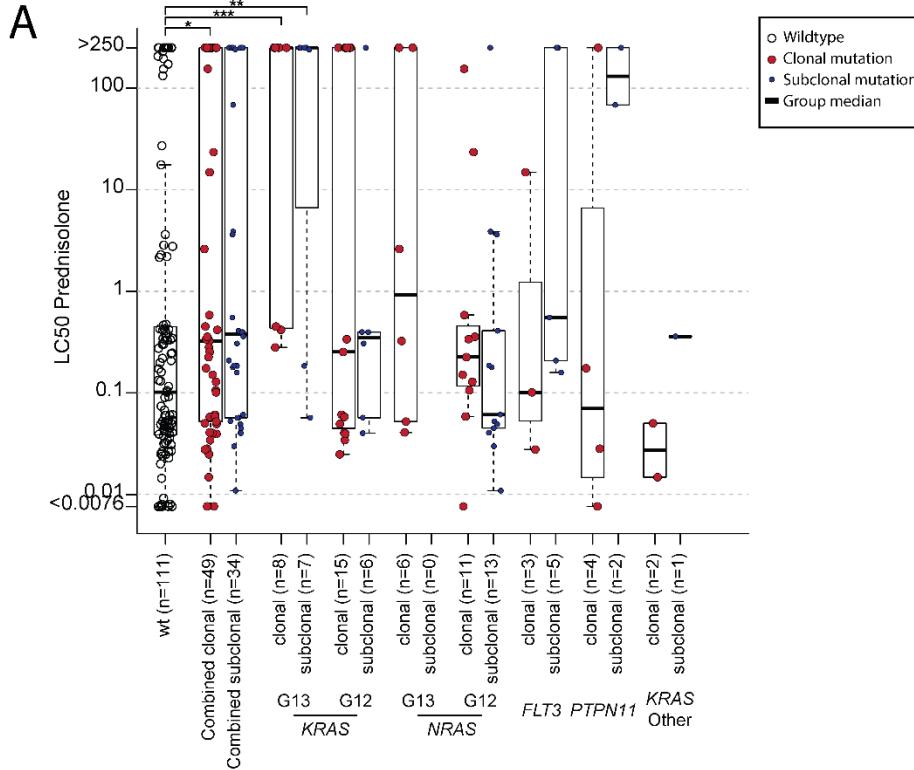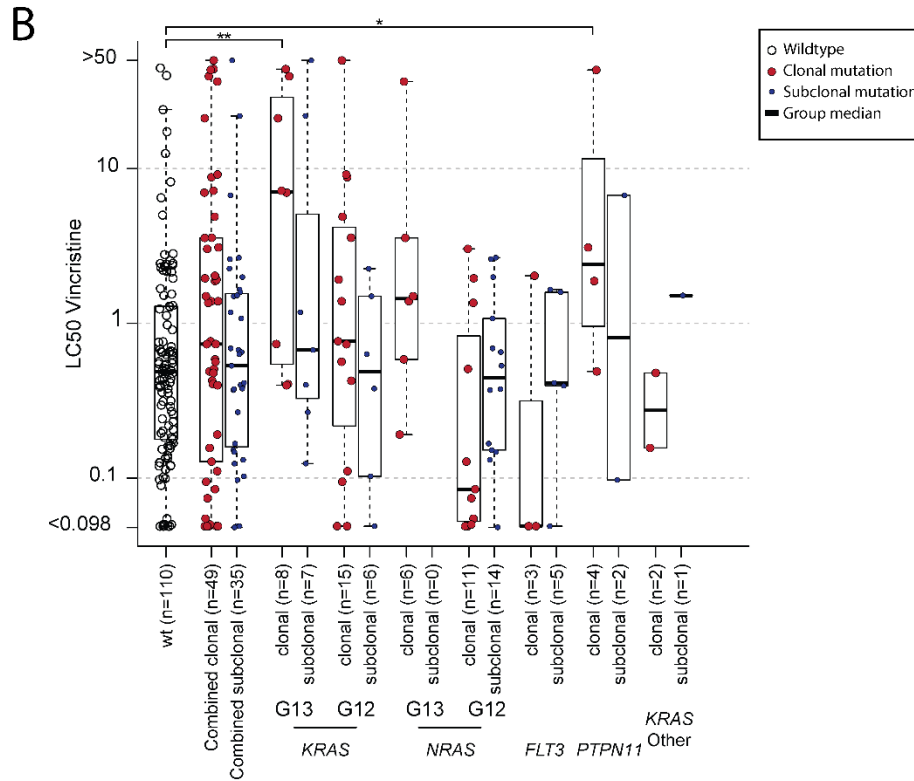

261 **Supplemental Figure S9: Ex vivo chemotherapeutic sensitivity of RAS mutated BCP-ALL cases distinguished by the**  
 262 **amino acid variant in the NRAS or KRAS gene.** In cases with multiple mutations, the mutation with the highest VAF  
 263 (largest clone) was used to classify cases. **A** Prednisolone sensitivity. **B** Vincristine sensitivity.

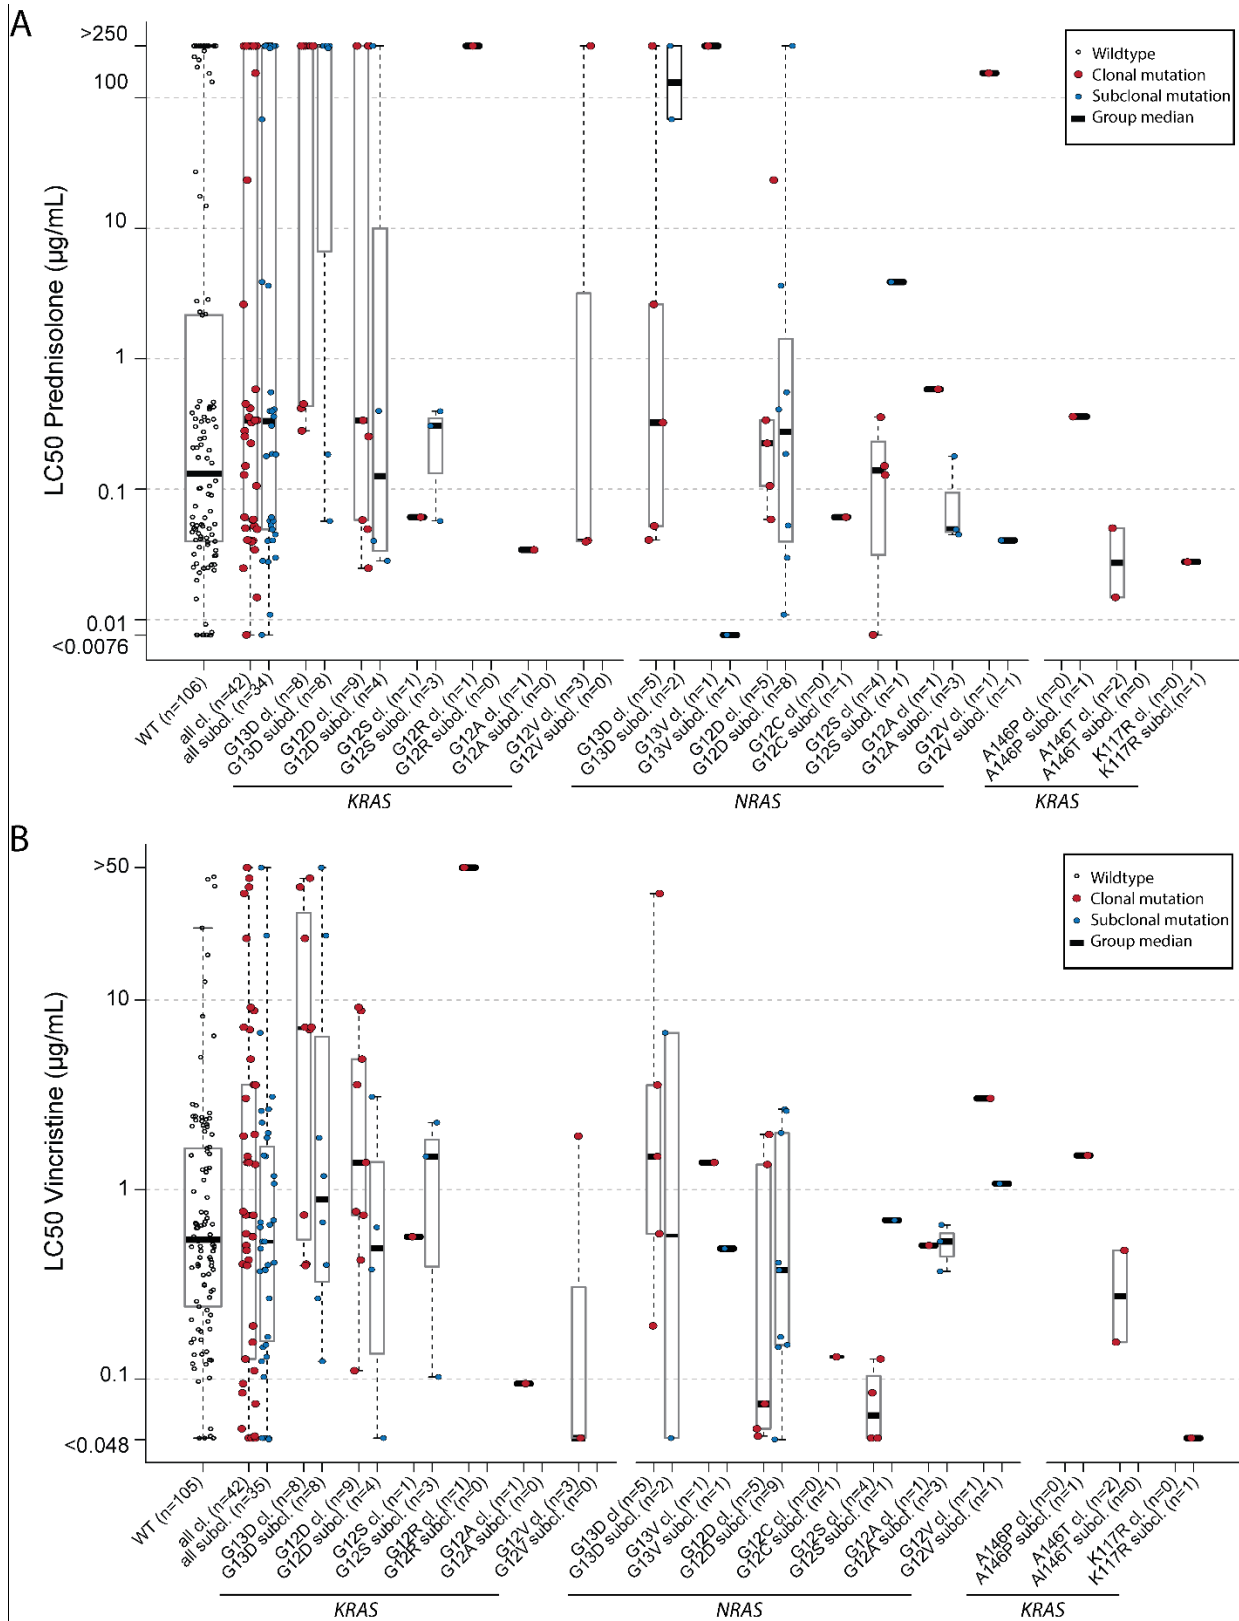

265 **Supplemental Figure S10: RAS pathway mutations and *ex vivo* cytotoxicity of chemotherapeutic agents.** *Ex vivo*  
 266 sensitivity of 211 primary patient samples towards (A) L-asparaginase, (B) daunorubicin, (C) 6-thioguanine, and (D)  
 267 6-mercaptopurinol, distinguished by RAS mutation status. Only clonally mutated cases are depicted. Only *KRAS* and  
 268 *NRAS* mutated groups are shown due to low recurrence of other mutations (see also supplement). Combined: All  
 269 cases with a clonal mutation in *NRAS*, *KRAS*, *PTPN11*, *FLT3*. Groups were compared by Mann-Whitney U test, \*  
 270  $p < 0.05$ , \*\*  $p < 0.01$ . LC50-values were evaluated by MTT assays as reported previously.

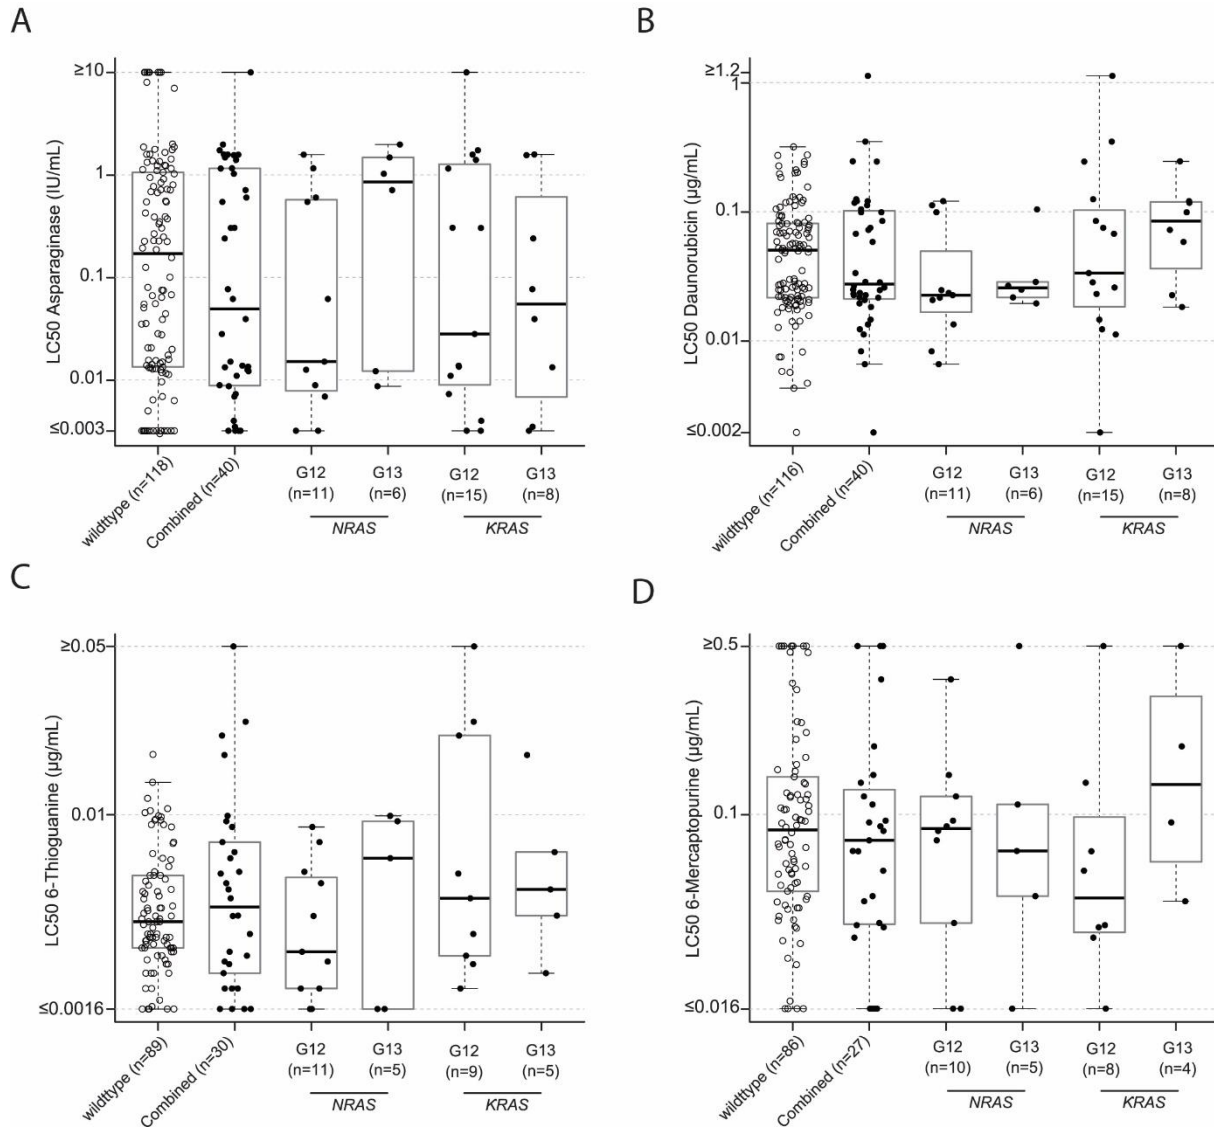

271

272 **Supplemental Figure S11: Efficacy of the MEK-inhibitor trametinib in RAS pathway mutant BCP-ALL.** **A** *Ex vivo*  
 273 sensitivity of primary BCP-ALL cases towards trametinib. Red lines represent RAS pathway mutated cases, black lines  
 274 represent RAS pathway wildtype cases. **B** Western blot of phosphorylated ERK1/2 to confirm effective MEK-inhibition  
 275 by a range of trametinib concentrations.

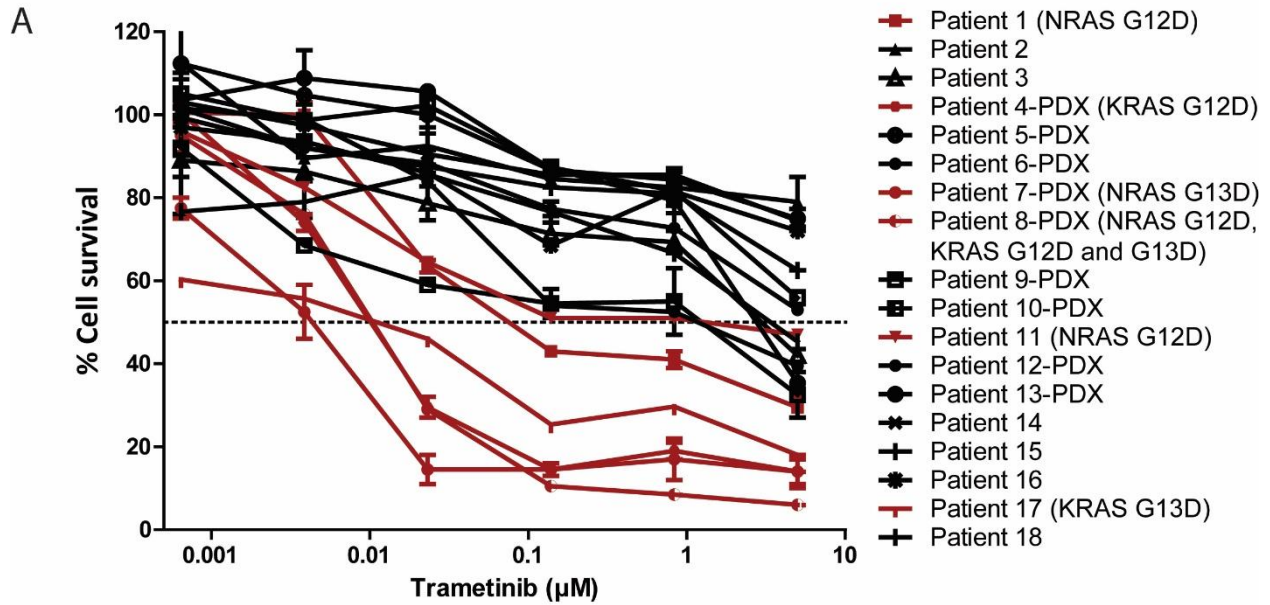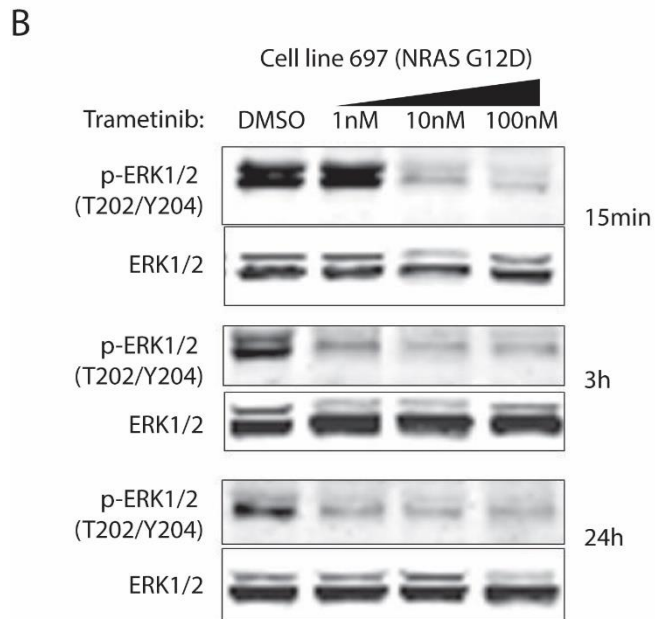

276

277

278 **References**

- 279 1. Den Boer ML, Harms DO, Pieters R, Kazemier KM, Gobel U, Korholz D, *et al.* Patient stratification based on  
280 prednisolone-vincristine-asparaginase resistance profiles in children with acute lymphoblastic leukemia. *J*  
281 *Clin Oncol* 2003 Sep 1; **21**(17): 3262-3268.  
282
- 283 2. Den Boer ML, van Slegtenhorst M, De Menezes RX, Cheek MH, Buijs-Gladdines JG, Peters ST, *et al.* A  
284 subtype of childhood acute lymphoblastic leukaemia with poor treatment outcome: a genome-wide  
285 classification study. *Lancet Oncol* 2009 Feb; **10**(2): 125-134.  
286
- 287 3. van der Veer A, Waanders E, Pieters R, Willemse ME, Van Reijmersdal SV, Russell LJ, *et al.* Independent  
288 prognostic value of BCR-ABL1-like signature and IKZF1 deletion, but not high CRLF2 expression, in children  
289 with B-cell precursor ALL. *Blood* 2013 Oct 10; **122**(15): 2622-2629.  
290
- 291 4. Kaspers GJ, Veerman AJ, Pieters R, Van Zantwijk CH, Smets LA, Van Wering ER, *et al.* In vitro cellular drug  
292 resistance and prognosis in newly diagnosed childhood acute lymphoblastic leukemia. *Blood* 1997 Oct 1;  
293 **90**(7): 2723-2729.  
294
- 295 5. Li H. Aligning sequence reads, clone sequences and assembly contigs with BWA-MEM. *arXiv preprint*  
296 *arXiv:13033997* 2013.  
297
- 298 6. Garrison E, Marth G. Haplotype-based variant detection from short-read sequencing. *arXiv preprint*  
299 *arXiv:12073907* 2012.  
300
- 301 7. Koboldt DC, Zhang Q, Larson DE, Shen D, McLellan MD, Lin L, *et al.* VarScan 2: somatic mutation and copy  
302 number alteration discovery in cancer by exome sequencing. *Genome Res* 2012 Mar; **22**(3): 568-576.  
303
- 304 8. Li H. A statistical framework for SNP calling, mutation discovery, association mapping and population  
305 genetical parameter estimation from sequencing data. *Bioinformatics* 2011 Nov 1; **27**(21): 2987-2993.  
306
- 307 9. DePristo MA, Banks E, Poplin R, Garimella KV, Maguire JR, Hartl C, *et al.* A framework for variation  
308 discovery and genotyping using next-generation DNA sequencing data. *Nature genetics* 2011 May; **43**(5):  
309 491-498.  
310
- 311 10. Cingolani P, Platts A, Wang le L, Coon M, Nguyen T, Wang L, *et al.* A program for annotating and predicting the  
312 effects of single nucleotide polymorphisms, SnpEff: SNPs in the genome of *Drosophila melanogaster*  
313 strain w1118; iso-2; iso-3. *Fly* 2012 Apr-Jun; **6**(2): 80-92.  
314
- 315 11. Liu X, Wu C, Li C, Boerwinkle E. dbNSFP v3.0: A One-Stop Database of Functional Predictions and  
316 Annotations for Human Nonsynonymous and Splice-Site SNVs. *Hum Mutat* 2016 Mar; **37**(3): 235-241.  
317
- 318 12. Forbes SA, Beare D, Gunasekaran P, Leung K, Bindal N, Boutselakis H, *et al.* COSMIC: exploring the world's  
319 knowledge of somatic mutations in human cancer. *Nucleic Acids Res* 2015 Jan; **43**(Database issue): D805-  
320 811.  
321
- 322 13. Aries IM, van den Dungen RE, Koudijs MJ, Cuppen E, Voest E, Molenaar JJ, *et al.* Towards personalized  
323 therapy in pediatric acute lymphoblastic leukemia: RAS mutations and prednisolone resistance.  
324 *Haematologica* 2015 Apr; **100**(4): e132-136.  
325
- 326 14. Escherich G, Troger A, Gobel U, Graubner U, Pekrun A, Jorch N, *et al.* The long-term impact of in vitro drug  
327 sensitivity on risk stratification and treatment outcome in acute lymphoblastic leukemia of childhood  
328 (CoALL 06-97). *Haematologica* 2011 Jun; **96**(6): 854-862.  
329

- 330 15. Gray RJ. cmprsk: Subdistribution Analysis of Competing Risks. 2013; **R package version 2.2-7**  
331 <http://CRAN.R-project.org/package=cmprsk>.  
332
- 333 16. de Wreede LC, Fiocco M, Putter H. mstate: An R Package for the Analysis of Competing Risks and Multi-  
334 State Models. *J Stat Softw* 2011 Jan; **38(7)**: 1-30.  
335
- 336 17. Therneau T. A Package for Survival Analysis in S. 2012; **R Package version 2.38-3**.  
337
